# Supplementary material for: Shifting paradigm from biomedical to decolonised methods in Inuit public health research in Canada: a scoping review
Source: HighWire-hosted journal article supplement (doi:10.1136/bmjgh-2021-008311), 2022-11-01
Supplement: bmjgh-2021-008311supp003_data_supplement.pdf [file bmjgh-2021-008311supp003_data_supplement.pdf]

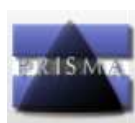

## Flow Diagram

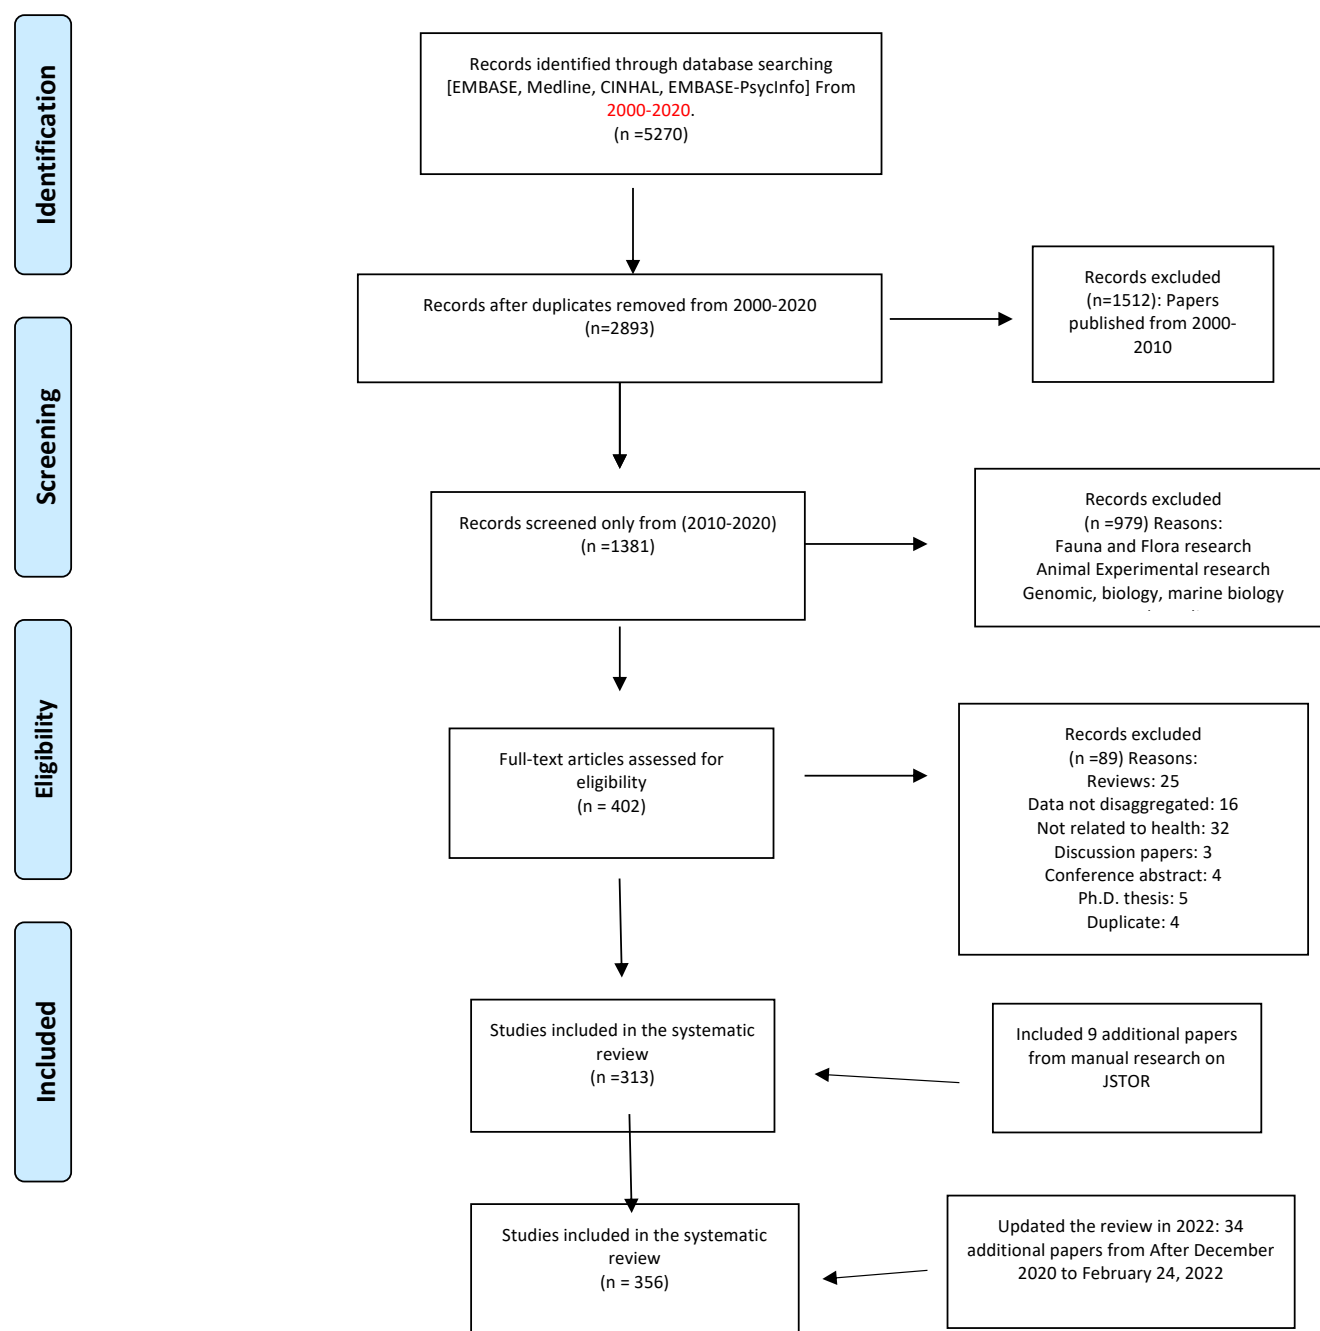

From: Moher D, Liberati A, Tetzlaff J, Altman DG, The PRISMA Group (2009). Preferred Reporting Items for Systematic Reviews and Meta-Analyses: The PRISMA Statement. PLoS Med 6(7): e1000097. doi:10.1371/journal.pmed1000097

For more information, visit [www.prisma-statement.org](http://www.prisma-statement.org).
