# Supplementary material for: Shifting paradigm from biomedical to decolonised methods in Inuit public health research in Canada: a scoping review
Source: HighWire-hosted journal article supplement (doi:10.1136/bmjgh-2021-008311), 2022-11-01
Supplement: bmjgh-2021-008311supp004_data_supplement.pdf [file bmjgh-2021-008311supp004_data_supplement.pdf]

## Appendix 5. References of the included studies

- Akande VO, Hendriks AM, Ruiter RA, Kremers SP. Determinants of dietary behavior and physical activity among Canadian Inuit: a systematic review. *International Journal of Behavioral Nutrition & Physical Activity*. 2015;12:84.
- Alvarez GG, VanDyk DD, Aaron SD, Cameron DW, Davies N, Stephen N, et al. Taima (stop) TB: the impact of a multifaceted TB awareness and door-to-door campaign in residential areas of high risk for TB in Iqaluit, Nunavut. *PLoS ONE [Electronic Resource]*. 2014;9(7):e100975.
- Asmis TR, Febbraro M, Alvarez GG, Spaans JN, Ruta M, Lalany A, et al. A retrospective review of cancer treatments and outcomes among Inuit referred from Nunavut, Canada. *Current Oncology*. 2015;22(4):246-51.
- Auger N, Fon Sing M, Park AL, Lo E, Trempe N, Luo ZC. Preterm birth in the Inuit and First Nations populations of Quebec, Canada, 1981-2008. *International Journal of Circumpolar Health*. 2012;71:17520.
- Auger N, Park AL, Zoungrana H, Fon Sing M, Lo E, Luo ZC. Widening inequality in extreme macrosomia between Indigenous and non-Indigenous populations of Quebec, Canada. *Australian & New Zealand Journal of Public Health*. 2013;37(1):58-62.
- Auger N, Park AL, Zoungrana H, McHugh NG, Luo ZC. Rates of stillbirth by gestational age and cause in Inuit and First Nations populations in Quebec. *CMAJ Canadian Medical Association Journal*. 2013;185(6):E256-62.
- Badry D, Felske AW. An examination of the social determinants of health as factors related to health, healing and prevention of foetal alcohol spectrum disorder in a northern context--the Brightening Our Home Fires Project, Northwest Territories, Canada. *International Journal of Circumpolar Health*. 2013;72.
- Bains A, Pakseresht M, Roache C, Beck L, Sheehy T, Gittelsohn J, et al. Healthy Foods North improves diet among Inuit and Inuvialuit women of childbearing age in Arctic Canada. *Journal of Human Nutrition & Dietetics*. 2014;27 Suppl 2:175-85.
- Beaumier MC, Ford JD. Food insecurity among Inuit women exacerbated by socioeconomic stresses and climate change. *Canadian Journal of Public Health Revue Canadienne de Sante Publique*. 2010;101(3):196-201.
- Bennett R, Cerigo H, Coutlee F, Roger M, Franco EL, Brassard P. Incidence, persistence, and determinants of human papillomavirus infection in a population of Inuit women in northern Quebec. *Sexually Transmitted Diseases*. 2015;42(5):272-8.
- Boucher O, Bastien CH, Saint-Amour D, Dewailly E, Ayotte P, Jacobson JL, et al. Prenatal exposure to methylmercury and PCBs affects distinct stages of information processing: an event-related potential study with Inuit children. *Neurotoxicology*. 2010;31(4):373-84.
- Boucher O, Burden MJ, Muckle G, Saint-Amour D, Ayotte P, Dewailly E, et al. Neurophysiologic evidence of beneficial effects of prenatal omega-3 fatty acids intake on visual recognition memory at school age. *International Journal of Psychophysiology*. 2010;77 (3):304.

- Boucher O, Bastien CH, Saint-Amour D, Dewailly E, Ayotte P, Jacobson JL, et al. Using event-related potentials in the assessment of the neurotoxic effects of seafood contaminants in Inuit children from Arctic Quebec. *Clinical Neurophysiology*. 2010;121:S124.
- Boucher O, Burden MJ, Muckle G, Saint-Amour D, Ayotte P, Dewailly E, et al. Neurophysiologic and neurobehavioral evidence of beneficial effects of prenatal omega-3 fatty acid intake on memory function at school age. *American Journal of Clinical Nutrition*. 2011;93(5):1025-37.
- Boucher O, Burden MJ, Muckle G, Saint-Amour D, Ayotte P, Dewailly E, et al. Response inhibition and error monitoring during a visual go/no-go task in inuit children exposed to lead, polychlorinated biphenyls, and methylmercury. *Environmental Health Perspectives*. 2012;120(4):608-15.
- Boucher O, Jacobson SW, Plusquellec P, Dewailly E, Ayotte P, Forget-Dubois N, et al. Prenatal methylmercury, postnatal lead exposure, and evidence of attention deficit/hyperactivity disorder among Inuit children in Arctic Quebec. *Environmental Health Perspectives*. 2012;120(10):1456-61.
- Boucher O, Jacobson JL, Burden MJ, Dewailly E, Jacobson SW, Muckle G. Prenatal tobacco exposure and response inhibition in school-aged children: an event-related potential study. *Neurotoxicology & Teratology*. 2014;44:81-8.
- Boucher O, Muckle G, Jacobson JL, Carter RC, Kaplan-Estrin M, Ayotte P, et al. Domain-specific effects of prenatal exposure to PCBs, mercury, and lead on infant cognition: results from the Environmental Contaminants and Child Development Study in Nunavik. *Environmental Health Perspectives*. 2014;122(3):310-6.
- Brass ER. Restoring balance: Determinants of health and depressive symptoms in aboriginal people. *Dissertation Abstracts International: Section B: The Sciences and Engineering*. 2013;74(1-B(E)):No Pagination Specified.
- Bruce SG, Riediger ND, Lix LM. Chronic disease and chronic disease risk factors among First Nations, Inuit and Metis populations of northern Canada. *Chronic Diseases and Injuries in Canada*. 2014;34(4):210-7.
- Brunger F, Russell T. Risk and Representation in Research Ethics:The NunatuKavut Experience. *Journal of Empirical Research on Human Research Ethics*. 2015;10(4):368-79.
- Burden MJ, Westerlund A, Muckle G, Dodge N, Dewailly E, Nelson CA, et al. The effects of maternal binge drinking during pregnancy on neural correlates of response inhibition and memory in childhood. *Alcoholism: Clinical & Experimental Research*. 2011;35(1):69-82.
- Bull JR. Research with Aboriginal peoples: authentic relationships as a precursor to ethical research. *Journal of Empirical Research on Human Research Ethics*. 2010;5(4):13-22.
- Carraher S, Chang HJ, Munday R, Goodman KJ, Group CAW. *Helicobacter pylori* incidence and re-infection in the Aklavik H. pylori Project. *International Journal of Circumpolar Health*. 2013;72.

- Carriere GM, Tjepkema M, Pennock J, Goedhuis N. Cancer patterns in Inuit Nunangat: 1998-2007. *International Journal of Circumpolar Health*. 2012;71:18581.
- Cartier C, Muckle G, Jacobson SW, Jacobson JL, Dewailly E, Ayotte P, et al. Prenatal and 5-year p,p'-DDE exposures are associated with altered sensory processing in school-aged children in Nunavik: a visual evoked potential study. *Neurotoxicology*. 2014;44:8-16.
- Cerigo H, Coutlee F, Franco EL, Brassard P. Factors associated with cervical cancer screening uptake among Inuit women in Nunavik, Quebec, Canada. *BMC Public Health*. 2013;13:438.
- Cerigo H, Macdonald ME, Franco EL, Brassard P. Awareness and knowledge about human papillomavirus among Inuit women in Nunavik, Quebec. *Journal of Community Health*. 2011;36(1):56-62.
- Cerigo H, Macdonald ME, Franco EL, Brassard P. Inuit women's attitudes and experiences towards cervical cancer and prevention strategies in Nunavik, Quebec. *International Journal of Circumpolar Health*. 2012;71:17996.
- Chachamovich E, Haggarty J, Cargo M, Hicks J, Kirmayer LJ, Turecki G. A psychological autopsy study of suicide among Inuit in Nunavut: methodological and ethical considerations, feasibility and acceptability. *International Journal of Circumpolar Health*. 2013;72:20078.
- Chachamovich E, Kirmayer LJ, Haggarty JM, Cargo M, McCormick R, Turecki G. Suicide Among Inuit: Results From a Large, Epidemiologically Representative Follow-Back Study in Nunavut. *Canadian Journal of Psychiatry - Revue Canadienne de Psychiatrie*. 2015;60(6):268-75.
- Chang HJ, Beach J, Senthilselvan A. Prevalence of and risk factors for asthma in off-reserve Aboriginal children and adults in Canada. *Canadian Respiratory Journal*. 2012;19(6):e68-e74.
- Chateau-Degat ML, Dewailly E, Charbonneau G, Laouan-Sidi EA, Tremblay A, Egeland GM. Obesity risks: towards an emerging Inuit pattern. *International Journal of Circumpolar Health*. 2011;70(2):166-77.
- Chateau-Degat ML, Dewailly E, Louchini R, Counil E, Noel M, Ferland A, et al. Cardiovascular burden and related risk factors among Nunavik (Quebec) Inuit: insights from baseline findings in the circumpolar Inuit health in transition cohort study. *Canadian Journal of Cardiology*. 2010;26(6):190-6.
- Chateau-Degat ML, Dewailly E, Noel M, Valera B, Ferland A, Counil E, et al. Hypertension among the Inuit from Nunavik: should we expect an increase because of obesity? *International Journal of Circumpolar Health*. 2010;69(4):361-72.
- Chateau-Degat ML, Dannenbaum DA, Egeland GM, Nieboer E, Laouan Sidi EA, Abdous B, et al. A comparison of the metabolic response to abdominal obesity in two Canadian Inuit and First Nations population. *Obesity*. 2011;19(11):2254-60.
- Chateau-Degat ML, Ferland A, Dery S, Dewailly E. Dietary sodium intake deleteriously affects blood pressure in a normotensive population. *European Journal of Clinical Nutrition*. 2012;66(4):533-5.
- Chen L, Xiao L, Auger N, Torrie J, McHugh NG, Zoungrana H, et al. Disparities and Trends in Birth Outcomes, Perinatal and Infant Mortality in Aboriginal vs. Non-Aboriginal

Populations: A Population-Based Study in Quebec, Canada 1996-2010. PLoS ONE [Electronic Resource]. 2015;10(9):e0138562.

- Cleophat JE, Le Meur JB, Proulx JF, De Wals P. Uptake of pneumococcal vaccines in the Nordic region of Nunavik, province of Quebec, Canada. Canadian Journal of Public Health Revue Canadienne de Sante Publique. 2014;105(4):e268-72.
- Collins SA, Surmala P, Osborne G, Greenberg C, Bathory LW, Edmunds-Potvin S, et al. Causes and risk factors for infant mortality in Nunavut, Canada 1999-2011. BMC Pediatrics. 2012;12:190.
- Counil E, Gauthier MJ, Blouin V, Grey M, Angiyu E, Kauki T, et al. Translational research to reduce trans-fat intakes in Northern Quebec (Nunavik) Inuit communities: a success story? International Journal of Circumpolar Health. 2012;71:18833.
- Couture A, Levesque B, Dewailly E, Muckle G, Dery S, Proulx JF. Lead exposure in Nunavik: from research to action. International Journal of Circumpolar Health. 2012;71:18591.
- Cole M, Healey G. Doing the right thing! A model for building a successful hospital-based ethics committee in Nunavut. International Journal of Circumpolar Health. 2013;72.
- Crighton EJ, Wilson K, Senecal S. The relationship between socio-economic and geographic factors and asthma among Canada's Aboriginal populations. International Journal of Circumpolar Health. 2010;69(2):138-50.
- Cunsolo Willox A, Harper SL, Ford JD, Landman K, Houle K, Edge VL, et al. "From this place and of this place:" climate change, sense of place, and health in Nunatsiavut, Canada. Social Science & Medicine. 2012;75(3):538-47.
- Curren MS, Davis K, Liang CL, Adlard B, Foster WG, Donaldson SG, et al. Comparing plasma concentrations of persistent organic pollutants and metals in primiparous women from northern and southern Canada. Science of the Total Environment. 2014;479-480:306-18.
- Curren MS, Liang CL, Davis K, Kandola K, Brewster J, Potyrala M, et al. Assessing determinants of maternal blood concentrations for persistent organic pollutants and metals in the eastern and western Canadian Arctic. Science of the Total Environment. 2015;527-528:150-8.
- Currie CL, Wild TC. Adolescent use of prescription drugs to get high in Canada. Canadian Journal of Psychiatry - Revue Canadienne de Psychiatrie. 2012;57(12):745-51.
- Cheung J, Goodman KJ, Girgis S, Bailey R, Morse J, Fedorak RN, et al. Disease manifestations of Helicobacter pylori infection in Arctic Canada: using epidemiology to address community concerns. BMJ Open. 2014;4(1):e003689.
- Daley K, Castleden H, Jamieson R, Furgal C, Ell L. Municipal water quantities and health in Nunavut households: an exploratory case study in Coral Harbour, Nunavut, Canada. International Journal of Circumpolar Health. 2014;73:1-10.
- Dallaire R, Dewailly E, Ayotte P, Forget-Dubois N, Jacobson SW, Jacobson JL, et al. Exposure to organochlorines and mercury through fish and marine mammal consumption: associations with growth and duration of gestation among Inuit newborns. Environment International. 2013;54:85-91.

- Dallaire R, Dewailly E, Ayotte P, Forget-Dubois N, Jacobson SW, Jacobson JL, et al. Growth in Inuit children exposed to polychlorinated biphenyls and lead during fetal development and childhood. *Environmental Research*. 2014;134:17-23.
- Davison CM, Ford CS, Peters PA, Hawe P. Community-driven alcohol policy in Canada's northern territories 1970-2008. *Health Policy*. 2011;102(1):34-40.
- Decaluwe B, Jacobson SW, Poirier MA, Forget-Dubois N, Jacobson JL, Muckle G. Impact of Inuit customary adoption on behavioral problems in school-age Inuit children. *American Journal of Orthopsychiatry*. 2015;85(3):250-8.
- Dell CA, Seguin M, Hopkins C, Tempier R, Mehl-Madrona L, Dell D, et al. From benzos to berries: treatment offered at an Aboriginal youth solvent abuse treatment centre relays the importance of culture. *Canadian Journal of Psychiatry - Revue Canadienne de Psychiatrie*. 2011;56(2):75-83.
- Desrosiers C, Boucher O, Forget-Dubois N, Dewailly E, Ayotte P, Jacobson SW, et al. Associations between prenatal cigarette smoke exposure and externalized behaviors at school age among Inuit children exposed to environmental contaminants. *Neurotoxicology & Teratology*. 2013;39:84-90.
- Doggett N, Dogra S. Physical inactivity and television-viewing time among Aboriginal adults with asthma: a cross-sectional analysis of the Aboriginal Peoples Survey. *Health Promotion and Chronic Disease Prevention in Canada*. 2015;35(3):54-61.
- Douglas VK. The Rankin Inlet Birthing Centre: community midwifery in the Inuit context. *International Journal of Circumpolar Health*. 2011;70(2):178-85.
- Durkalec A, Furgal C, Skinner MW, Sheldon T. Investigating environmental determinants of injury and trauma in the Canadian north. *International Journal of Environmental Research & Public Health [Electronic Resource]*. 2014;11(2):1536-48.
- Egeland GM, Cao Z, Young TK. Hypertriglyceridemic-waist phenotype and glucose intolerance among Canadian Inuit: the International Polar Year Inuit Health Survey for Adults 2007-2008. *CMAJ Canadian Medical Association Journal*. 2011;183(9):E553-8.
- Egeland GM, Faraj N, Osborne G. Cultural, socioeconomic, and health indicators among Inuit preschoolers: Nunavut Inuit Child Health Survey, 2007-2008. *Rural & Remote Health*. 2010;10(2):1365.
- Egeland GM, Johnson-Down L, Cao ZR, Sheikh N, Weiler H. Food insecurity and nutrition transition combine to affect nutrient intakes in Canadian arctic communities. *Journal of Nutrition*. 2011;141(9):1746-53.
- Egeland GM, Pacey A, Cao Z, Sobol I. Food insecurity among Inuit preschoolers: Nunavut Inuit Child Health Survey, 2007-2008. *CMAJ Canadian Medical Association Journal*. 2010;182(3):243-8.
- El Hayek J, Egeland G, Weiler H. Vitamin D status of Inuit preschoolers reflects season and vitamin D intake. *Journal of Nutrition*. 2010;140(10):1839-45.
- El Hayek J, Egeland G, Weiler H. Older age and lower adiposity predict better 25-hydroxy vitamin D concentration in Inuit adults: International Polar Year Inuit Health Survey, 2007-2008. *Archives of Osteoporosis*. 2011;6:167-77.

- Erber E, Beck L, De Roose E, Sharma S. Prevalence and risk factors for self-reported chronic disease amongst Inuvialuit populations. *Journal of Human Nutrition & Dietetics*. 2010;23 Suppl 1:43-50.
- Erber E, Beck L, Hopping BN, Sheehy T, De Roose E, Sharma S. Food patterns and socioeconomic indicators of food consumption amongst Inuvialuit in the Canadian Arctic. *Journal of Human Nutrition & Dietetics*. 2010;23 Suppl 1:59-66.
- Erber E, Hopping BN, Beck L, Sheehy T, De Roose E, Sharma S. Assessment of dietary adequacy in a remote Inuvialuit population. *Journal of Human Nutrition & Dietetics*. 2010;23 Suppl 1:35-42.
- Ethier AA, Muckle G, Bastien C, Dewailly E, Ayotte P, Arfken C, et al. Effects of environmental contaminant exposure on visual brain development: a prospective electrophysiological study in school-aged children. *Neurotoxicology*. 2012;33(5):1075-85.
- Ethier AA, Muckle G, Jacobson SW, Ayotte P, Jacobson JL, Saint-Amour D. Assessing new dimensions of attentional functions in children prenatally exposed to environmental contaminants using an adapted Posner paradigm. *Neurotoxicology & Teratology*. 2015;51:27-34.
- Ferland A, Lamarche B, Chateau-Degat ML, Counil E, Anassour-Laouan-Sidi E, Abdous B, et al. Dairy product intake and its association with body weight and cardiovascular disease risk factors in a population in dietary transition. *Journal of the American College of Nutrition*. 2011;30(2):92-9.
- Fillion M, Laird B, Douglas V, Van Pelt L, Archie D, Chan HM. Development of a strategic plan for food security and safety in the Inuvialuit Settlement Region, Canada. *International Journal of Circumpolar Health*. 2014;73:25091.
- Findlay L, Kohen D, Miller A. Developmental milestones among Aboriginal children in Canada. *Paediatrics & Child Health*. 2014;19(5):241-6.
- Findlay LC. Physical activity among First Nations people off reserve, Metis and Inuit. *Health Reports*. 2011;22(1):47-54.
- Findlay LC, Langlois KA, Kohen DE. Hunger among Inuit children in Canada. *International Journal of Circumpolar Health*. 2013;72.
- Fines P, Bougie E, Oliver LN, Kohen DE. Hospitalizations for unintentional injuries among Canadian adults in areas with a high percentage of Aboriginal-identity residents. *Chronic Diseases and Injuries in Canada*. 2013;33(4):204-17.
- Ford J, Lardeau MP, Vanderbilt W. The characteristics and experience of community food program users in arctic Canada: a case study from Iqaluit, Nunavut. *BMC Public Health*. 2012;12:464.
- Ford JD, Beaumier M. Feeding the family during times of stress: experience and determinants of food insecurity in an Inuit community. *The Geographical Journal*. 2011;177(1):44-61.
- Ford JD, Lardeau MP, Blackett H, Chatwood S, Kurszewski D. Community food program use in Inuvik, Northwest Territories. *BMC Public Health*. 2013;13:970.



- Fortin M, Belanger RE, Boucher O, Muckle G. Temporal trends of alcohol and drug use among Inuit of Northern Quebec, Canada. *International Journal of Circumpolar Health*. 2015;74:29146.
- Fox GJ, Lee RS, Lucas M, Khan FA, Proulx JF, Hornby K, et al. Inadequate Diet Is Associated with Acquiring Mycobacterium tuberculosis Infection in an Inuit Community. A Case-Control Study. *Annals of the American Thoracic Society*. 2015;12(8):1153-62.
- Fraser SL, Geoffroy D, Chachamovich E, Kirmayer LJ. Changing rates of suicide ideation and attempts among Inuit youth: a gender-based analysis of risk and protective factors. *Suicide & Life-Threatening Behavior*. 2015;45(2):141-56.
- Fraser SL, Muckle G, Abdous BB, Jacobson JL, Jacobson SW. Effects of binge drinking on infant growth and development in an Inuit sample. *Alcohol*. 2012;46(3):277-83.
- Fraser SL, Nadeau L. Experience and representations of health and social services in a community of Nunavik. *Contemporary Nurse*. 2015;51(2-3):286-300.
- Gagne D, Blanchet R, Lauziere J, Vaissiere E, Vezina C, Ayotte P, et al. Traditional food consumption is associated with higher nutrient intakes in Inuit children attending childcare centres in Nunavik. *International Journal of Circumpolar Health*. 2012;71:18401.
- Gagne D, Blanchet R, Vaissiere E, Lauziere J, Vezina C, Vinet-Lanouette C, et al. Impact of a childcare centre nutrition program on nutrient intakes in Nunavik Inuit children. *Canadian Journal of Dietetic Practice & Research*. 2013;74(1):e311-7.
- Gagne D, Lauziere J, Blanchet R, Vezina C, Vaissiere E, Ayotte P, et al. Consumption of tomato products is associated with lower blood mercury levels in Inuit preschool children. *Food & Chemical Toxicology*. 2013;51:404-10.
- Galloway T, Johnson-Down L, Egeland GM. Socioeconomic and Cultural Correlates of Diet Quality in the Canadian Arctic: Results from the 2007-2008 Inuit Health Survey. *Canadian Journal of Dietetic Practice & Research*. 2015;76(3):117-25.
- Galloway T, Young TK, Egeland GM. Emerging obesity among preschool-aged Canadian Inuit children: results from the Nunavut Inuit Child Health Survey. *International Journal of Circumpolar Health*. 2010;69(2):151-7.
- Gilbert NL, Nelson CR, Greaves L. Smoking cessation during pregnancy and relapse after childbirth in Canada. *Journal of Obstetrics & Gynaecology Canada: JOGC*. 2015;37(1):32-9.
- Gilbert NL, Auger N, Tjepkema M. Stillbirth and infant mortality in Aboriginal communities in Quebec. *Health Reports*. 2015;26(2):3-8.
- Gittelsohn J, Roache C, Kratzmann M, Reid R, Ogina J, Sharma S. Participatory research for chronic disease prevention in Inuit communities. *American Journal of Health Behavior*. 2010;34(4):453-64.
- Guevremont A, Kohen D. The physical and mental health of Inuit children of teenage mothers. *Health Reports*. 2012;23(4):15-22.
- Guo Y, Berrang-Ford L, Ford J, Lardeau MP, Edge V, Patterson K, et al. Seasonal prevalence and determinants of food insecurity in Iqaluit, Nunavut. *International Journal of Circumpolar Health*. 2015;74:27284.

- Hamlin-Douglas LK, Coutlee F, Roger M, Hanley J, Franco EL, Brassard P. Determinants of human papillomavirus infection among Inuit women of northern Quebec, Canada. *Sexually Transmitted Diseases*. 2010;37(6):377-81.
- Harper SL, Edge VL, Cunsolo Willox A, Rigolet Inuit Community G. 'Changing climate, changing health, changing stories' profile: using an EcoHealth approach to explore impacts of climate change on Inuit health. *Ecohealth*. 2012;9(1):89-101.
- Harper SL, Edge VL, Ford J, Thomas MK, Group IR, Rigolet Inuit Community G, et al. Lived experience of acute gastrointestinal illness in Rigolet, Nunatsiavut: "just suffer through it". *Social Science & Medicine*. 2015;126:86-98.
- Harper SL, Edge VL, Ford J, Thomas MK, Pearl D, Shirley J, et al. Healthcare use for acute gastrointestinal illness in two Inuit communities: Rigolet and Iqaluit, Canada. *International Journal of Circumpolar Health*. 2015;74:26290.
- Harper SL, Edge VL, Ford J, Willox AC, Wood M, Team IR, et al. Climate-sensitive health priorities in Nunatsiavut, Canada. *BMC Public Health*. 2015;15:605.
- Harper SL, Edge VL, Schuster-Wallace CJ, Berke O, McEwen SA. Weather, water quality and infectious gastrointestinal illness in two Inuit communities in Nunatsiavut, Canada: potential implications for climate change. *Ecohealth*. 2011;8(1):93-108.
- Helferty M, Rotondo JL, Martin I, Desai S. The epidemiology of invasive pneumococcal disease in the Canadian North from 1999 to 2010. *International Journal of Circumpolar Health*. 2013;72.
- Hopping BN, Erber E, Beck L, De Roose E, Sharma S. Inuvialuit adults in the Canadian Arctic have a high body mass index and self-reported physical activity. *Journal of Human Nutrition & Dietetics*. 2010;23 Suppl 1:115-9.
- Hopping BN, Erber E, Mead E, Roache C, Sharma S. High levels of physical activity and obesity co-exist amongst Inuit adults in Arctic Canada. *Journal of Human Nutrition & Dietetics*. 2010;23 Suppl 1:110-4.
- Hopping BN, Erber E, Mead E, Sheehy T, Roache C, Sharma S. Socioeconomic indicators and frequency of traditional food, junk food, and fruit and vegetable consumption amongst Inuit adults in the Canadian Arctic. *Journal of Human Nutrition & Dietetics*. 2010;23 Suppl 1:51-8.
- Hopping BN, Mead E, Erber E, Sheehy C, Roache C, Sharma S. Dietary adequacy of Inuit in the Canadian Arctic. *Journal of Human Nutrition & Dietetics*. 2010;23 Suppl 1:27-34.
- Huet C, Rosol R, Egeland GM. The prevalence of food insecurity is high and the diet quality poor in Inuit communities. *Journal of Nutrition*. 2012;142(3):541-7.
- Jacobson JL, Muckle G, Ayotte P, Dewailly E, Jacobson SW. Relation of Prenatal Methylmercury Exposure from Environmental Sources to Childhood IQ. *Environmental Health Perspectives*. 2015;123(8):827-33.
- Jamieson JA, Kuhnlein HV, Weiler HA, Egeland GM. Higher n3-fatty acid status is associated with lower risk of iron depletion among food insecure Canadian Inuit women. *BMC Public Health*. 2013;13:289.
- Jamieson JA, Weiler HA, Kuhnlein HV, Egeland GM. Traditional food intake is correlated with iron stores in Canadian Inuit men. *Journal of Nutrition*. 2012;142(4):764-70.



- Jardine C, Furgal C. Knowledge translation with northern Aboriginal communities: a case study. *Canadian Journal of Nursing Research*. 2010;42(1):119-27.
- Jiang Y, Brassard P, Severini A, Mao Y, Li YA, Laroche J, et al. The prevalence of human papillomavirus and its impact on cervical dysplasia in Northern Canada. *Infectious Agents & Cancer [Electronic Resource]*. 2013;8(1):25.
- Johnson-Down L, Egeland GM. Adequate nutrient intakes are associated with traditional food consumption in nunavut inuit children aged 3-5 years. *Journal of Nutrition*. 2010;140(7):1311-6.
- Kaspar V. Mental health of Aboriginal children and adolescents in violent school environments: protective mediators of violence and psychological/nervous disorders. *Social Science & Medicine*. 2013;81:70-8.
- Kellett S, Poirier P, Dewailly E, Sampasa H, Chateau-Degat ML. Is severe obesity a cardiovascular health concern in the Inuit population? *American Journal of Human Biology*. 2012;24(4):441-5.
- Kohen DE, Bougie E, Guevremont A. Housing and health among Inuit children. *Health Reports*. 2015;26(11):21-7.
- Kolahdooz F, Barr A, Roache C, Sheehy T, Corriveau A, Sharma S. Dietary adequacy of vitamin D and calcium among Inuit and Inuvialuit women of child-bearing age in Arctic Canada: a growing concern. *PLoS ONE [Electronic Resource]*. 2013;8(11):e78987.
- Kolahdooz F, Butler L, Lupu M, Sheehy T, Corriveau A, Sharma S. Assessment of dietary intake among Inuvialuit in Arctic Canada using a locally developed quantitative food frequency questionnaire. *Journal of the American College of Nutrition*. 2014;33(2):147-54.
- Kolahdooz F, Mathe N, Katunga LA, Beck L, Sheehy T, Corriveau A, et al. Smoking and dietary inadequacy among Inuvialuit women of child bearing age in the Northwest Territories, Canada. *Nutrition Journal*. 2013;12:27.
- Kolahdooz F, Pakseresht M, Mead E, Beck L, Corriveau A, Sharma S. Impact of the Healthy Foods North nutrition intervention program on Inuit and Inuvialuit food consumption and preparation methods in Canadian Arctic communities. *Nutrition Journal*. 2014;13:68.
- Kolahdooz F, Spearing K, Corriveau A, Sharma S. Dietary adequacy and alcohol consumption of Inuvialuit women of child-bearing age in the Northwest Territories, Canada. *Journal of Human Nutrition & Dietetics*. 2013;26(6):570-7.
- Konrad S, Hossain A, Senthilselvan A, Dosman JA, Pahwa P. Chronic bronchitis in Aboriginal people--prevalence and associated factors. *Chronic Diseases and Injuries in Canada*. 2013;33(4):218-25.
- Kovesi TA, Cao Z, Osborne G, Egeland GM. Severe early lower respiratory tract infection is associated with subsequent respiratory morbidity in preschool Inuit children in Nunavut, Canada. *Journal of Asthma*. 2011;48(3):241-7.
- Kozicky SK, Mathe N, Butler JL, Hebert TM, Corriveau A, Sharma S. Assessment of supplement use (including vitamin D) in Inuvialuit adults in the Northwest Territories, Canada. *Journal of Human Nutrition & Dietetics*. 2013;26(2):169-74.

- Kral MJ. "The weight on our shoulders is too much, and we are falling": Suicide among Inuit male youth in Nunavut, Canada. *Medical Anthropology Quarterly*. 2013;27(1):63-83.
- Kral MJ, Idlout L, Minore JB, Dyck RJ, Kirmayer LJ. Unikkaaruit: meanings of well-being, unhappiness, health, and community change among Inuit in Nunavut, Canada. *American Journal of Community Psychology*. 2011;48(3-4):426-38.
- Kral MJ, Salusky I, Inuksuk P, Angutimarik L, Tulugardjuk N. Tunngajuq: stress and resilience among Inuit youth in Nunavut, Canada. *Transcultural Psychiatry*. 2014;51(5):673-92.
- Kirmayer LJ, Dandeneau S, Marshall E, Phillips MK, Williamson KJ. Rethinking resilience from indigenous perspectives. *Canadian Journal of Psychiatry - Revue Canadienne de Psychiatrie*. 2011;56(2):84-91.
- Labonte ME, Dewailly E, Lucas M, Chateau-Degat ML, Couture P, Lamarche B. Traditional dietary pattern is associated with elevated cholesterol among the Inuit of Nunavik. *Journal of the Academy of Nutrition & Dietetics*. 2014;114(8):1208-15.e3.
- Laird BD, Goncharov AB, Egeland GM, Chan HM. Dietary advice on Inuit traditional food use needs to balance benefits and risks of mercury, selenium, and n3 fatty acids. *Journal of Nutrition*. 2013;143(6):923-30.
- Langlois KA, Findlay LC, Kohen DE. Dietary habits of Aboriginal children. *Health Reports*. 2013;24(4):3-7.
- Lauster N, Tester F. Culture as a problem in linking material inequality to health: on residential crowding in the Arctic. *Health & Place*. 2010;16(3):523-30.
- Lardeau MP, Healey G, Ford J. The use of Photovoice to document and characterize the food security of users of community food programs in Iqaluit, Nunavut. *Rural & Remote Health*. 2011;11(2):1680.
- Lauson S, McIntosh S, Obed N, Healey G, Asuri S, Osborne G, et al. The development of a comprehensive maternal-child health information system for Nunavut-Nutaqqavut (Our Children). *International Journal of Circumpolar Health*. 2011;70(4):363-72.
- Le Meur JB, Lefebvre B, Proulx JF, Dery S, Pepin J, De Wals P. Impact of pneumococcal vaccines use on invasive pneumococcal disease in Nunavik (Quebec) from 1997 to 2010. *International Journal of Circumpolar Health*. 2014;73:22691.
- Lefebvre M, Chang HJ, Morse A, van Zanten SV, Goodman KJ, Group CAW. Adherence and barriers to *H. pylori* treatment in Arctic Canada. *International Journal of Circumpolar Health*. 2013;72:22791.
- Lessard L, Fournier L, Gauthier J, Morin D. Continuum of care for persons with common mental health disorders in Nunavik: a descriptive study. *International Journal of Circumpolar Health*. 2015;74:27186.
- Lucas M, Kirmayer LJ, Dery S, Dewailly E. Erythrocyte n-3 is inversely correlated with serious psychological distress among the Inuit: data from the Nunavik health survey. *Journal of the American College of Nutrition*. 2010;29(3):211-21.
- Luo ZC, Senecal S, Simonet F, Guimond E, Penney C, Wilkins R. Birth outcomes in the Inuit-inhabited areas of Canada. *CMAJ Canadian Medical Association Journal*. 2010;182(3):235-42.

- Luo ZC, Wilkins R, Heaman M, Smylie J, Martens PJ, McHugh NG, et al. Birth outcomes and infant mortality among First Nations Inuit, and non-Indigenous women by northern versus southern residence, Quebec. *Journal of Epidemiology & Community Health*. 2012;66(4):328-33.
- Macdonald ME, Bathory LW, Shenker H, Weiler H, Berry M, Sharma A, et al. Understanding healthy pregnancies: the perspective of Inuit midwives in northwestern Quebec. *Canadian Journal of Rural Medicine*. 2014;19(4):128-33.
- McDonald JT, Trenholm R. Cancer-related health behaviours and health service use among Inuit and other residents of Canada's north. *Social Science & Medicine*. 2010;70(9):1396-403.
- McIsaac KE, Lou W, Sellen D, Young TK. Exclusive breastfeeding among Canadian Inuit: results from the Nunavut Inuit Child Health Survey. *Journal of Human Lactation*. 2014;30(2):229-41.
- McIsaac KE, Sellen DW, Lou W, Young K. Prevalence and Characteristics Associated with Breastfeeding Initiation Among Canadian Inuit from the 2007-2008 Nunavut Inuit Child Health Survey. *Maternal & Child Health Journal*. 2015;19(9):2003-11.
- McShane KE, Smylie JK, Hastings PD, Prince C, Tungasuvvingat Inuit Family Health T, Siedule C. Evaluation of the acceptability of a CD-Rom as a health promotion tool for Inuit in Ottawa. *International Journal of Circumpolar Health*. 2013;72:20573.
- Mead E, Gittelsohn J, De Roose E, Sharma S. Important psychosocial factors to target in nutrition interventions to improve diet in Inuvialuit communities in the Canadian Arctic. *Journal of Human Nutrition & Dietetics*. 2010;23 Suppl 1:92-9.
- Mead E, Gittelsohn J, Kratzmann M, Roache C, Sharma S. Impact of the changing food environment on dietary practices of an Inuit population in Arctic Canada. *Journal of Human Nutrition & Dietetics*. 2010;23 Suppl 1:18-26.
- Mead E, Gittelsohn J, Roache C, Sharma S. Healthy food intentions and higher socioeconomic status are associated with healthier food choices in an Inuit population. *Journal of Human Nutrition & Dietetics*. 2010;23 Suppl 1:83-91.
- Mead EL, Gittelsohn J, Roache C, Corriveau A, Sharma S. A community-based, environmental chronic disease prevention intervention to improve healthy eating psychosocial factors and behaviors in indigenous populations in the Canadian Arctic. *Health Education & Behavior*. 2013;40(5):592-602.
- Medehouenou TC, Ayotte P, St-Jean A, Meziou S, Roy C, Muckle G, et al. Overweight and Obesity Prevalence Among School-Aged Nunavik Inuit Children According to Three Body Mass Index Classification Systems. *Journal of Adolescent Health*. 2015;57(1):31-6.
- Minich K, Saudny H, Lennie C, Wood M, Williamson-Bathory L, Cao Z, et al. Inuit housing and homelessness: results from the International Polar Year Inuit Health Survey 2007-2008. *International Journal of Circumpolar Health*. 2011;70(5):520-31.
- Muckle G, Laflamme D, Gagnon J, Boucher O, Jacobson JL, Jacobson SW. Alcohol, smoking, and drug use among Inuit women of childbearing age during pregnancy and the risk to children. *Alcoholism: Clinical & Experimental Research*. 2011;35(6):1081-91.

- Ng C, Chatwood S, Young TK. Arthritis in the Canadian Aboriginal population: North-South differences in prevalence and correlates. *Chronic Diseases in Canada*. 2010;31(1):22-6.
- Oliver LN, Fines P, Bougie E, Kohen D. Intentional injury hospitalizations in geographical areas with a high percentage of Aboriginal-identity residents, 2004/2005 to 2009/2010. *Chronic Diseases and Injuries in Canada*. 2014;34(2-3):82-93.
- Oliver LN, Kohen DE. Unintentional injury hospitalizations among children and youth in areas with a high percentage of Aboriginal identity residents: 2001/2002 to 2005/2006. *Health Reports*. 2012;23(3):7-15.
- Oliver LN, Peters PA, Kohen DE. Mortality rates among children and teenagers living in Inuit Nunangat, 1994 to 2008. *Health Reports*. 2012;23(3):17-22.
- Organ J, Castleden H, Furgal C, Sheldon T, Hart C. Contemporary programs in support of traditional ways: Inuit perspectives on community freezers as a mechanism to alleviate pressures of wild food access in Nain, Nunatsiavut. *Health & Place*. 2014;30:251-9.
- Pacey A, Nancarrow T, Egeland GM. Prevalence and risk factors for parental-reported oral health of Inuit preschoolers: Nunavut Inuit Child Health Survey, 2007-2008. *Rural & Remote Health*. 2010;10(2):1368.
- Pacey A, Weiler H, Egeland GM. Low prevalence of iron-deficiency anaemia among Inuit preschool children: Nunavut Inuit Child Health Survey, 2007-2008. *Public Health Nutrition*. 2011;14(8):1415-23.
- Pakseresht M, Kolahdooz F, Gittelsohn J, Roache C, Corriveau A, Sharma S. Improving vitamin A and D intake among Inuit and Inuvialuit in Arctic Canada: evidence from the Healthy Foods North study. *Journal of Epidemiology & Community Health*. 2015;69(5):453-9.
- Pakseresht M, Mead E, Gittelsohn J, Roache C, Sharma S. Awareness of chronic disease diagnosis amongst family members is associated with healthy dietary knowledge but not behaviour amongst Inuit in Arctic Canada. *Journal of Human Nutrition & Dietetics*. 2010;23 Suppl 1:100-9.
- Pakseresht M, Sharma S. Validation of a culturally appropriate quantitative food frequency questionnaire for Inuvialuit population in the Northwest Territories, Canada. *Journal of Human Nutrition & Dietetics*. 2010;23 Suppl 1:75-82.
- Pakseresht M, Sharma S. Validation of a quantitative food frequency questionnaire for Inuit population in Nunavut, Canada. *Journal of Human Nutrition & Dietetics*. 2010;23 Suppl 1:67-74.
- Panagiotopoulos C, Nguyen D, Smith J. Cardiovascular risk factors and health behaviours in elementary school-age Inuvialuit and Gwich'in children. *Paediatrics & Child Health*. 2014;19(5):256-60.
- Peters PA. Causes and contributions to differences in life expectancy for Inuit Nunangat and Canada, 1994-2003. *International Journal of Circumpolar Health*. 2010;69(1):38-49.
- Peters PA. An age- and cause decomposition of differences in life expectancy between residents of Inuit Nunangat and residents of the rest of Canada, 1989 to 2008. *Health Reports*. 2013;24(12):3-9.

- Petrasek MacDonald J, Cunsolo Willox A, Ford JD, Shiwak I, Wood M, Team I, et al. Protective factors for mental health and well-being in a changing climate: Perspectives from Inuit youth in Nunatsiavut, Labrador. *Social Science & Medicine*. 2015;141:133-41.
- Pirkle CM, Lucas M, Dallaire R, Ayotte P, Jacobson JL, Jacobson SW, et al. Food insecurity and nutritional biomarkers in relation to stature in Inuit children from Nunavik. *Canadian Journal of Public Health Revue Canadienne de Sante Publique*. 2014;105(4):e233-8.
- Plante C, Rochette L, Blanchet C, O'Brien HT. Prevalence and types of anemia among Inuit women from Nunavik (Canada). *FASEB Journal Conference: Experimental Biology*. 2011;25(Meeting Abstracts).
- Plourde C, Brunelle N, Landry M. Dealing with substance use in Nunavik: An amalgamation of traditions and modern practices. *Drogues, sante et societe*. 2010;9(1):77-120.
- Pufall EL, Jones AQ, McEwen SA, Lyall C, Peregrine AS, Edge VL. Community-derived research dissemination strategies in an Inuit community. *International Journal of Circumpolar Health*. 2011;70(5):532-41.
- Plusquellec P, Muckle G, Dewailly E, Ayotte P, Begin G, Desrosiers C, et al. The relation of environmental contaminants exposure to behavioral indicators in Inuit preschoolers in Arctic Quebec. *Neurotoxicology*. 2010;31(1):17-25.
- Rittmueller SE, Corriveau A, Sharma S. Differences in dietary quality and adequacy by smoking status among a Canadian Aboriginal population. *Public Health*. 2012;126(6):490-7.
- Rittmueller SE, Corriveau A, Sharma S. Dietary quality and adequacy among Aboriginal alcohol consumers in the Northwest Territories, Canada. *International Journal of Circumpolar Health*. 2012;71:17341.
- Riva M, Plusquellec P, Juster RP, Laouan-Sidi EA, Abdous B, Lucas M, et al. Household crowding is associated with higher allostatic load among the Inuit. *Journal of Epidemiology & Community Health*. 2014;68(4):363-9.
- Rosol R, Huet C, Wood M, Lennie C, Osborne G, Egeland GM. Prevalence of affirmative responses to questions of food insecurity: International Polar Year Inuit Health Survey, 2007-2008. *International Journal of Circumpolar Health*. 2011;70(5):488-97.
- Ruiz-Castell M, Muckle G, Dewailly E, Jacobson JL, Jacobson SW, Ayotte P, et al. Household crowding and food insecurity among Inuit families with school-aged children in the Canadian Arctic. *American Journal of Public Health*. 2015;105(3):e122-32.
- Sarkar A, Hanrahan M, Hudson A. Water insecurity in Canadian Indigenous communities: some inconvenient truths. *Rural & Remote Health*. 2015;15(4):3354.
- Saudny H, Cao Z, Egeland GM. Poor self-reported health and its association with biomarkers among Canadian Inuit. *International Journal of Circumpolar Health*. 2012;71.
- Schaefer SE, Erber E, Trzaskos JP, Roache C, Osborne G, Sharma S. Sources of food affect dietary adequacy of Inuit women of childbearing age in Arctic Canada. *Journal of Health, Population & Nutrition*. 2011;29(5):454-64.

- Severini A, Jiang Y, Brassard P, Morrison H, Demers AA, Oguntuase E, et al. Type-specific prevalence of human papillomavirus in women screened for cervical cancer in Labrador, Canada. *International Journal of Circumpolar Health*. 2013;72.
- Sharma S, Gittelsohn J, Rosol R, Beck L. Addressing the public health burden caused by the nutrition transition through the Healthy Foods North nutrition and lifestyle intervention programme. *Journal of Human Nutrition & Dietetics*. 2010;23 Suppl 1:120-7.
- Sharma S. Assessing diet and lifestyle in the Canadian Arctic Inuit and Inuvialuit to inform a nutrition and physical activity intervention programme. *Journal of Human Nutrition & Dietetics*. 2010;23 Suppl 1:5-17.
- Sharma S, Hopping BN, Roache C, Sheehy T. Nutrient intakes, major food sources and dietary inadequacies of Inuit adults living in three remote communities in Nunavut, Canada. *Journal of Human Nutrition & Dietetics*. 2013;26(6):578-86.
- Sheehy T, Kolahdooz F, Roache C, Sharma S. Changing dietary patterns in the Canadian Arctic: frequency of consumption of foods and beverages by Inuit in three Nunavut communities. *Food & Nutrition Bulletin*. 2014;35(2):244-52.
- Sheehy T, Kolahdooz F, Schaefer SE, Douglas DN, Corriveau A, Sharma S. Traditional food patterns are associated with better diet quality and improved dietary adequacy in Aboriginal peoples in the Northwest Territories, Canada. *Journal of Human Nutrition & Dietetics*. 2015;28(3):262-71.
- Sheehy T, Kolahdooz F, Roache C, Sharma S. Traditional food consumption is associated with better diet quality and adequacy among Inuit adults in Nunavut, Canada. *International Journal of Food Sciences & Nutrition*. 2015;66(4):445-51.
- Sheehy T, Roache C, Sharma S. Eating habits of a population undergoing a rapid dietary transition: portion sizes of traditional and non-traditional foods and beverages consumed by Inuit adults in Nunavut, Canada. *Nutrition Journal*. 2013;12:70.
- Sheikh N, Egeland GM, Johnson-Down L, Kuhnlein HV. Changing dietary patterns and body mass index over time in Canadian Inuit communities. *International Journal of Circumpolar Health*. 2011;70(5):511-9.
- Simonet F, Wassimi S, Heaman M, Smylie J, Martens P, McHugh NG, et al. Individual- and Community-Level Disparities in Birth Outcomes and Infant Mortality among First Nations, Inuit and Other Populations in Quebec. *The Open Womens Health Journal*. 2010;4:18-24.
- Simonet F, Wilkins R, Heaman M, Smylie J, Martens P, McHugh NG, et al. Urban Living is Not Associated with Better Birth and Infant Outcomes among Inuit and First Nations in Quebec. *The Open Womens Health Journal*. 2010;4:25-31.
- Simonet F, Wilkins R, Luo ZC. Temporal trends in Inuit, First Nations and non-Aboriginal birth outcomes in rural and northern Quebec. *International Journal of Circumpolar Health*. 2012;71.
- Singer J, Putulik Kidlapik C, Martin B, Dean HJ, Trepman E, Embil JM. Food consumption, obesity and abnormal glycaemic control in a Canadian Inuit community. *Clinical Obesity*. 2014;4(6):316-23.



- Tan JC, Maranzan KA, Boone M, Vander Velde J, Levy S. Caller characteristics, call contents, and types of assistance provided by caller sex and age group in a Canadian Inuit crisis line in Nunavut, 1991-2001. *Suicide & Life-Threatening Behavior*. 2012;42(2):210-6.
- Valera B, Ayotte P, Poirier P, Dewailly E. Associations between plasma persistent organic pollutant levels and blood pressure in Inuit adults from Nunavik. *Environment International*. 2013;59:282-9.
- Valera B, Muckle G, Poirier P, Jacobson SW, Jacobson JL, Dewailly E. Cardiac autonomic activity and blood pressure among Inuit children exposed to mercury. *Neurotoxicology*. 2012;33(5):1067-74.
- Valera B, Dewailly E, Poirier P. Association between methylmercury and cardiovascular risk factors in a native population of Quebec (Canada): a retrospective evaluation. *Environmental Research*. 2013;120:102-8.
- van den Scott LJ. Science, politics, and identity in northern research ethics licensing. *Journal of Empirical Research on Human Research Ethics*. 2012;7(1):28-36.
- Van Wagner V, Osepchuk C, Harney E, Crosbie C, Tulugak M. Remote midwifery in Nunavik, Quebec, Canada: outcomes of perinatal care for the Inuulitsivik health centre, 2000-2007. *Birth*. 2012;39(3):230-7.
- Volpe T, Boydell KM, Pignatiello A. Mental health services for Nunavut children and youth: evaluating a telepsychiatry pilot project. *Rural & Remote Health*. 2014;14(2):2673.
- Wakegijig J, Osborne G, Statham S, Issaluk MD. Collaborating toward improving food security in Nunavut. *International Journal of Circumpolar Health*. 2013;72.
- Wesche SD, Chan HM. Adapting to the impacts of climate change on food security among Inuit in the Western Canadian Arctic. *Ecohealth*. 2010;7(3):361-73.
- Willox AC, Harper SL, Edge VL. Storytelling in a digital age: Digital storytelling as an emerging narrative method for preserving and promoting indigenous oral wisdom. *Qualitative Research*. 2013;13(2):127-47.
- Wood DS. Alcohol controls and violence in Nunavut: a comparison of wet and dry communities. *International Journal of Circumpolar Health*. 2011;70(1):19-28.
- Ye M, Mandhane PJ, Senthilselvan A. Association of breastfeeding with asthma in young Aboriginal children in Canada. *Canadian Respiratory Journal*. 2012;19(6):361-6.
- Zienczuk N, Egeland GM. Association between socioeconomic status and overweight and obesity among Inuit adults: International Polar Year Inuit Health Survey, 2007-2008. *International Journal of Circumpolar Health*. 2012;71(0):1-7.
- Zienczuk N, Young TK, Cao ZR, Egeland GM. Dietary correlates of an at-risk BMI among Inuit adults in the Canadian high arctic: cross-sectional international polar year Inuit health survey, 2007-2008. *Nutrition Journal*. 2012;11:73.
- Zotor F, Sheehy T, Lupu M, Kolahdooz F, Corriveau A, Sharma S. Frequency of consumption of foods and beverages by Inuvialuit adults in Northwest Territories, Arctic Canada. *International Journal of Food Sciences & Nutrition*. 2012;63(7):782-9.

- Hanrahan M, Sarkar A, Hudson A. Exploring Water Insecurity in a Northern Indigenous Community in Canada: The "Never-Ending Job" of the Southern Inuit of Black Tickle, Labrador. *Arctic Anthropology*. 2014;51(2):9-22.
- Harper SL, Edge VL, Ford J, Thomas MK, Pearl DL, Shirley J, et al. Acute gastrointestinal illness in two Inuit communities: burden of illness in Rigolet and Iqaluit, Canada. *Epidemiology & Infection*. 2015;143(14):3048-63.
- Kyu HH, Georgiades K, MacMillan HL, Boyle MH. Community- and individual-level factors associated with smoking and heavy drinking among Aboriginal people in Canada. *Canadian Journal of Public Health Revue Canadienne de Sante Publique*. 2015;106(2):e22-8.
- Healey G, Magner R, Ritter R, Kamookak A, Aningmiqu B, Issaluk K, et al. Community perspectives on the impact of climate change on health in Nunavut, Canada. *ARTIC*. 2011;64(1):89-97.
- Harder MT, Wenzel GW. Inuit subsistence, social economy and food security in Clyde River, Nunavut. *ARTIC*. 2012;65(3):245-366.
- Affleck W, Chachamovich E, Chawky N, Beauchamp G, Turecki G, Seguin M. Suicide amongst the Inuit of Nunavut: An Exploration of Life Trajectories. *International Journal of Environmental Research & Public Health [Electronic Resource]*. 2020;17(6):11.
- Ahmed A, Becker A. Evaluation of eczema, asthma, allergic rhinitis and allergies among the grade-7 children of Iqaluit. *Allergy, Asthma, & Clinical Immunology : Official Journal of the Canadian Society of Allergy & Clinical Immunology*. 2019;15:26.
- Ahmed A, Hakim A, Becker A. Evaluation of eczema, asthma, allergic rhinitis and allergies among the Grade-1 children of Iqaluit. *Allergy, Asthma, & Clinical Immunology : Official Journal of the Canadian Society of Allergy & Clinical Immunology*. 2018;14:9.
- Alvarez GG, Van Dyk DD, Colquhoun H, Moreau KA, Mulpuru S, Graham ID. Developing and Field Testing a Community Based Youth Initiative to Increase Tuberculosis Awareness in Remote Arctic Inuit Communities. *PLoS ONE [Electronic Resource]*. 2016;11(7):e0159241.
- Anang P, Naujaat Elder EH, Gordon E, Gottlieb N, Bronson M. Building on strengths in Naujaat: the process of engaging Inuit youth in suicide prevention. *International Journal of Circumpolar Health*. 2019;78(2):1508321.
- Baron M, Fletcher C, Riva M. Aging, Health and Place from the Perspective of Elders in an Inuit Community. *Journal of Cross-Cultural Gerontology*. 2020;35(2):133-53.
- Baron M, Riva M, Fletcher C. The social determinants of healthy ageing in the Canadian Arctic. *International Journal of Circumpolar Health*. 2019;78(1):1630234.
- Beaudoin V, Seguin M, Chawky N, Affleck W, Chachamovich E, Turecki G. Protective Factors in the Inuit Population of Nunavut: A Comparative Study of People Who Died by Suicide, People Who Attempted Suicide, and People Who Never Attempted Suicide. *International Journal of Environmental Research & Public Health [Electronic Resource]*. 2018;15(1):16.
- Bougie E, Kohen D. Smoking prevalence among Inuit in Canada. *Health Reports*. 2017;28(2):10-4.

- Bougie E, Arim RG, Kohen DE, Findlay LC. Validation of the 10-item Kessler Psychological Distress Scale (K10) in the 2012 Aboriginal Peoples Survey. *Health Reports*. 2016;27(1):3-10.
- Bougie E, Kohen DE. Smoking correlates among Inuit men and women in Inuit Nunangat. *Health Reports*. 2018;29(3):3-10.
- Bradette-Laplanche M, Courtemanche Y, Desrochers-Couture M, Forget-Dubois N, Belanger RE, Ayotte P, et al. Food insecurity and psychological distress in Inuit adolescents of Nunavik. *Public Health Nutrition*. 2020;23(14):2615-25.
- Brooks-Cleator LA, Giles AR, Flaherty M. Community-level factors that contribute to First Nations and Inuit older adults feeling supported to age well in a Canadian city. *Journal of Aging Studies*. 2019;48:50-9.
- Bull J, Hudson A. Research governance in NunatuKavut: engagement, expectations and evolution. *International Journal of Circumpolar Health*. 2019;78(2):1556558.
- Calder RSD, Bromage S, Sunderland EM. Risk tradeoffs associated with traditional food advisories for Labrador Inuit. *Environmental Research*. 2019;168:496-506.
- Chan J, Friborg J, Zubizarreta E, van Eck JW, Hanna TP, Bourque JM, et al. Examining geographic accessibility to radiotherapy in Canada and Greenland for indigenous populations: Measuring inequities to inform solutions. *Radiotherapy & Oncology*. 2020;146:1-8.
- Carriere G, Bougie E, Kohen D, Rotermann M, Sanmartin C. Acute care hospitalization by Aboriginal identity, Canada, 2006 through 2008. *Health Reports*. 2016;27(8):3-11.
- Clark DG, Ford JD, Pearce T, Berrang-Ford L. Vulnerability to unintentional injuries associated with land-use activities and search and rescue in Nunavut, Canada. *Social Science & Medicine*. 2016;169:18-26.
- Collings P, Marten MG, Pearce T, Young AG. Country food sharing networks, household structure, and implications for understanding food insecurity in Arctic Canada. *Ecology of Food & Nutrition*. 2016;55(1):30-49.
- Cordier S, Anassour-Laouan-Sidi E, Lemire M, Costet N, Lucas M, Ayotte P. Association between exposure to persistent organic pollutants and mercury, and glucose metabolism in two Canadian Indigenous populations. *Environmental Research*. 2020;184:109345.
- Corosky GJ, Blystad A. Staying healthy "under the sheets": Inuit youth experiences of access to sexual and reproductive health and rights in Arviat, Nunavut, Canada. *International Journal of Circumpolar Health*. 2016;75:31812.
- De Wals P, Lemeur JB, Ayukawa H, Proulx JF. Middle ear abnormalities at age 5 years in relation with early onset otitis media and number of episodes, in the Inuit population of Nunavik, Quebec, Canada. *International Journal of Circumpolar Health*. 2019;78(1):1599269.
- De Wals P, Zhou Z, LeMeur JB, Proulx JF. Burden of respiratory infections and otitis media in the Inuit population of Nunavik, Quebec, Canada. *International Journal of Circumpolar Health*. 2020;79(1):1799688.

- Decaluwe B, Fortin M, Moisan C, Muckle G, Belanger RE. Drinking motives supporting binge drinking of Inuit adolescents. *Canadian Journal of Public Health Revue Canadienne de Sante Publique*. 2019;110(4):414-21.
- Desrochers-Couture M, Courtemanche Y, Forget-Dubois N, Belanger RE, Boucher O, Ayotte P, et al. Association between early lead exposure and externalizing behaviors in adolescence: A developmental cascade. *Environmental Research*. 2019;178:108679.
- Dion R, Brisson M, Proulx JF, Zoungrana H. Results of a population screening intervention for tuberculosis in a Nunavik village, Quebec, 2015-2016. *Canada Communicable Disease Report*. 2018;44(10):257-63.
- Duncan K, Erickson AC, Egeland GM, Weiler H, Arbour LT. Red blood cell folate levels in Canadian Inuit women of childbearing years: influence of food security, body mass index, smoking, education, and vitamin use. *Canadian Journal of Public Health Revue Canadienne de Sante Publique*. 2018;109(5-6):684-91.
- El Hayek Fares J, Weiler HA. Vitamin D status and intake of lactating Inuit women living in the Canadian Arctic. *Public Health Nutrition*. 2018;21(11):1988-94.
- Etter M, Goose A, Nossal M, Chishom-Nelson J, Heck C, Joobar R, et al. Improving youth mental wellness services in an Indigenous context in Ulukhaktok, Northwest Territories: ACCESS Open Minds Project. *Early intervention in psychiatry*. 2019;13 Suppl 1:35-41.
- Farrow S, Agarwal A, Saban J, Scott D, Barrowman N, Kovesi T. Oral aspiration, type 1 laryngeal cleft, and respiratory tract infections in Canadian Inuit children. *Pediatric Pulmonology*. 2019;54(11):1837-43.
- Fitzpatrick EM, McCurdy L, Whittingham J, Rourke R, Nassrallah F, Grandpierre V, et al. Hearing loss prevalence and hearing health among school-aged children in the Canadian Arctic. *International Journal of Audiology*. 2020;1-11.
- Fortin M, Muckle G, Anassour-Laouan-Sidi E, Jacobson SW, Jacobson JL, Belanger RE. Trajectories of Alcohol Use and Binge Drinking Among Pregnant Inuit Women. *Alcohol & Alcoholism*. 2016;51(3):339-46.
- Fournier B, Eastlick Kushner K, Raine K. "To me, policy is government": Creating a locally driven healthy food environment in the Canadian Arctic. *Health & Place*. 2019;58:102138.
- Fraser S, Vrakas G, Laliberte A, Mickpegak R. Everyday ethics of participation: a case study of a CBPR in Nunavik. *Global Health Promotion*. 2018;25(1):82-90.
- Fraser S, Plourde-Leveille L, Kirmayer LJ. Exploring the potential roles of community-university partnerships in northern suicide prevention implementation research. *International Journal of Circumpolar Health*. 2020;79(1):1835271.
- Fraser SL, Hordyk SR, Etok N, Weetaltuk C. Exploring Community Mobilization in Northern Quebec: Motivators, Challenges, and Resilience in Action. *American Journal of Community Psychology*. 2019;64(1-2):159-71.
- Frigault JS, Giles AR. Culturally Safe Falls Prevention Program for Inuvialuit Elders in Inuvik, Northwest Territories, Canada: Considerations for Development and Implementation-ERRATUM. *Canadian journal on aging = La revue canadienne du vieillissement*. 2020;39(2):329.

- Galloway T, Horlick S, Cherba M, Cole M, Woodgate RL, Healey Akearok G. Perspectives of Nunavut patients and families on their cancer and end of life care experiences. *International Journal of Circumpolar Health*. 2020;79(1):1766319.
- Gautier L, Pirkle CM, Furgal C, Lucas M. Assessment of the implementation fidelity of the Arctic Char Distribution Project in Nunavik, Quebec. *BMJ Global Health*. 2016;1(3):e000093.
- Glass CTR, Giles AR. Community-based risk messaging in Inuvik, Northwest Territories, Canada. *Health Promot Int*. 2020;35(3):555-61.
- Gray AP, Richer F, Harper S. Individual- and community-level determinants of Inuit youth mental wellness. *Canadian Journal of Public Health Revue Canadienne de Sante Publique*. 2016;107(3):e251-e7.
- Guevremont A, Carriere G, Bougie E, Kohen D. Acute care hospitalization of Aboriginal children and youth. *Health Reports*. 2017;28(7):11-7.
- Haag HL, Biscardi M, Smith NN, MacGregor N, Colantonio A. Traumatic brain injury and intimate partner violence: Addressing knowledge and service gaps among indigenous populations in Canada. *Brain Impairment*. 2019;20(2):197-210.
- Hackett C, Feeny D, Tompa E. Canada's residential school system: measuring the intergenerational impact of familial attendance on health and mental health outcomes. *Journal of Epidemiology & Community Health*. 2016;70(11):1096-105.
- Hajizadeh M, Bombay A, Asada Y. Socioeconomic inequalities in psychological distress and suicidal behaviours among Indigenous peoples living off-reserve in Canada. *CMAJ Canadian Medical Association Journal*. 2019;191(12):E325-E36.
- Hajizadeh M, Hu M, Bombay A, Asada Y. Socioeconomic inequalities in health among Indigenous peoples living off-reserve in Canada: Trends and determinants. *Health Policy*. 2018;122(8):854-65.
- He H, Xiao L, Torrie JE, Auger N, McHugh NG, Zoungrana H, et al. Disparities in infant hospitalizations in Indigenous and non-Indigenous populations in Quebec, Canada. *CMAJ Canadian Medical Association Journal*. 2017;189(21):E739-E46.
- Healey G. Youth perspectives on sexually transmitted infections and sexual health in Northern Canada and implications for public health practice. *International Journal of Circumpolar Health*. 2016;75:30706.
- Healey GK. Inuit family perspectives and stories about sexual health and relationships in Nunavut. *Dissertation Abstracts International: Section B: The Sciences and Engineering*. 2016;77(6-B(E)):No Pagination Specified.
- Hordyk SR, Macdonald ME, Brassard P. Inuit interpreters engaged in end-of-life care in Nunavik, Northern Quebec. *International Journal of Circumpolar Health*. 2017;76(1):1291868.
- Hordyk SR, Macdonald ME, Brassard P. End-of-Life Care in Nunavik, Quebec: Inuit Experiences, Current Realities, and Ways Forward. *Journal of Palliative Medicine*. 2017;20(6):647-55.
- Hu XF, Eccles KM, Chan HM. High selenium exposure lowers the odds ratios for hypertension, stroke, and myocardial infarction associated with mercury exposure among Inuit in Canada. *Environment International*. 2017;102:200-6.

- Hu XF, Laird BD, Chan HM. Mercury diminishes the cardiovascular protective effect of omega-3 polyunsaturated fatty acids in the modern diet of Inuit in Canada. *Environmental Research*. 2017;152:470-7.
- Hu XF, Sharin T, Chan HM. Dietary and blood selenium are inversely associated with the prevalence of stroke among Inuit in Canada. *Journal of Trace Elements in Medicine & Biology*. 2017;44:322-30.
- Hu XF, Singh K, Kenny TA, Chan HM. Prevalence of heart attack and stroke and associated risk factors among Inuit in Canada: A comparison with the general Canadian population. *International Journal of Hygiene & Environmental Health*. 2019;222(2):319-26.
- Huet C, Ford JD, Edge VL, Shirley J, King N, Team IR, et al. Food insecurity and food consumption by season in households with children in an Arctic city: a cross-sectional study. *BMC Public Health*. 2017;17(1):578.
- Jamieson JA, Weiler HA, Kuhnlein HV, Egeland GM. Prevalence of unexplained anaemia in Inuit men and Inuit post-menopausal women in Northern Labrador: International Polar Year Inuit Health Survey. *Canadian Journal of Public Health Revue Canadienne de Sante Publique*. 2016;107(1):e81-e7.
- Jull J, Hizaka A, Sheppard AJ, Kewayosh A, Doering P, MacLeod L, et al. An integrated knowledge translation approach to develop a shared decision-making strategy for use by Inuit in cancer care: a qualitative study. *Current Oncology*. 2019;26(3):192-204.
- Kenny TA, Hu XF, Kuhnlein HV, Wesche SD, Chan HM. Dietary sources of energy and nutrients in the contemporary diet of Inuit adults: results from the 2007-08 Inuit Health Survey. *Public Health Nutrition*. 2018;21(7):1319-31.
- Kenny TA, MacLean J, Gale P, Keats S, Chan HM, Wesche SD. Linking health and the environment through education-A Traditional Food Program in Inuvik, Western Canadian Arctic. *Journal of Hunger and Environmental Nutrition*. 2018;13(3):429-32.
- Khan FA, Fox GJ, Lee RS, Riva M, Benedetti A, Proulx JF, et al. Housing and tuberculosis in an Inuit village in northern Quebec: a case-control study. *CMAJ open*. 2016;4(3):E496-E506.
- Kilabuk E, Momoli F, Mallick R, Van Dyk D, Pease C, Zwerling A, et al. Social determinants of health among residential areas with a high tuberculosis incidence in a remote Inuit community. *Journal of Epidemiology & Community Health*. 2019;73(5):401-6.
- Kitching GT, Firestone M, Schei B, Wolfe S, Bourgeois C, O'Campo P, et al. Unmet health needs and discrimination by healthcare providers among an Indigenous population in Toronto, Canada. *Canadian Journal of Public Health*. 2020;111(1):40-9.
- Lamoureux-Tremblay V, Muckle G, Maheu F, Jacobson SW, Jacobson JL, Ayotte P, et al. Risk factors associated with developing anxiety in Inuit adolescents from Nunavik. *Neurotoxicology and Teratology*. 2020;81 (no pagination).
- Le Meur JB, Ayukawa H, Proulx JF, De Wals P. Prevalence of middle ear abnormalities from otitis media in relation with pneumococcal vaccine use in the Inuit population of Nunavik, province of Quebec, Canada. *Vaccine*. 2018;36(34):5180-6.



- LeMeur JB, Lefebvre B, Proulx JF, De Wals P. Limited impact of pneumococcal vaccines on invasive pneumococcal disease in Nunavik (Quebec). *Canadian Journal of Public Health Revue Canadienne de Sante Publique*. 2019;110(1):36-43.
- Levesque A, Quesnel-Vallee A. Gender variations in the relationship between social capital and mental health outcomes among the Indigenous populations of Canada. *International Journal for Equity in Health*. 2019;18(1):124.
- Malla A, Iyer S, Shah J, Joober R, Boksa P, Lal S, et al. Canadian response to need for transformation of youth mental health services: ACCESS Open Minds (Esprits ouverts). *Early intervention in psychiatry*. 2019;13(3):697-706.
- Martin D, McNally M, Castleden H, Worden-Driscoll I, Clarke M, Wall D, et al. Linking Inuit Knowledge and Public Health for Improved Child and Youth Oral Health in NunatuKavut. *Jdr Clinical & Translational Research*. 2018;3(3):256-63.
- McDonnell L, Lavoie JG, Healy G, Wong S, Goulet S, Clark W. Non-clinical determinants of Medevacs in Nunavut: perspectives from northern health service providers and decision-makers. *International Journal of Circumpolar Health*. 2019;78(1):1571384.
- McIsaac KE, Stock DC, Lou W. Household food security and breast-feeding duration among Canadian Inuit. *Public Health Nutrition*. 2017;20(1):64-71.
- Mercer N, Hanrahan M. "Straight from the heavens into your bucket": domestic rainwater harvesting as a measure to improve water security in a subarctic indigenous community. *International Journal of Circumpolar Health*. 2017;76(1):1312223.
- Middleton J, Cunsolo A, Jones-Bitton A, Shiwak I, Wood M, Pollock N, et al. "We're people of the snow:" Weather, climate change, and Inuit mental wellness. *Social Science & Medicine*. 2020;262:113137.
- Nelson C, Lawford KM, Otterman V, Darling EK. Mental health indicators among pregnant Aboriginal women in Canada: results from the Maternity Experiences Survey. *Health Promotion and Chronic Disease Prevention in Canada*. 2018;38(7-8):269-76.
- Newell SL, Dion ML, Doubleday NC. Cultural continuity and Inuit health in Arctic Canada. *Journal of Epidemiology & Community Health*. 2020;74(1):64-70.
- Ospina MB, Rowe BH, Voaklander D, Senthilselvan A, Stickland MK, King M. Emergency Department Visits after Diagnosed Chronic Obstructive Pulmonary Disease in Aboriginal People in Alberta, Canada. *CJEM Canadian Journal of Emergency Medical Care*. 2016;18(6):420-8.
- Pace J. "Place-ing" Dementia Prevention and Care in NunatuKavut, Labrador. *Canadian Journal on Aging*. 2020;39(2):247-62.
- Pease C, Zwerling A, Mallick R, Patterson M, Demaio P, Finn S, et al. The latent tuberculosis infection cascade of care in Iqaluit, Nunavut, 2012-2016. *BMC Infectious Diseases*. 2019;19(1):890.
- Pepin C, Muckle G, Moisan C, Forget-Dubois N, Riva M. Household overcrowding and psychological distress among Nunavik Inuit adolescents: a longitudinal study. *International Journal of Circumpolar Health*. 2018;77(1):1541395.
- Pollock NJ, Mulay S, Valcour J, Jong M. Suicide Rates in Aboriginal Communities in Labrador, Canada. *American Journal of Public Health*. 2016;106(7):1309-15.

- Racicot-Matta C, Wilcke M, Egeland GM. Development of radio dramas for health communication pilot intervention in Canadian Inuit communities. *Health Promotion International*. 2016;31(1):175-86.
- Rand JR. Inuit women's stories of strength: informing Inuit community-based HIV and STI prevention and sexual health promotion programming. *International Journal of Circumpolar Health*. 2016;75:32135.
- Riva M, Fletcher C, Dufresne P, Perreault K, Muckle G, Potvin L, et al. Relocating to a new or pre-existing social housing unit: significant health improvements for Inuit adults in Nunavik and Nunavut. *Canadian Journal of Public Health Revue Canadienne de Sante Publique*. 2020;111(1):21-30.
- Saini M, Roche S, Papadopoulos A, Markwick N, Shiwak I, Flowers C, et al. Promoting Inuit health through a participatory whiteboard video. *Canadian Journal of Public Health Revue Canadienne de Sante Publique*. 2020;111(1):50-9.
- Sefidbakht S, Johnson-Down L, Young TK, Egeland GM. High protein and cholesterol intakes associated with emergence of glucose intolerance in a low-risk Canadian Inuit population. *Public Health Nutrition*. 2016;19(10):1804-11.
- Sheppard AJ, Shapiro GD, Bushnik T, Wilkins R, Perry S, Kaufman JS, et al. Birth outcomes among First Nations, Inuit and Metis populations. *Health Reports*. 2017;28(11):11-6.
- Singh K, Chan HM. Persistent organic pollutants and diabetes among Inuit in the Canadian Arctic. *Environment International*. 2017;101:183-9.
- Singh K, Chan HM. Association of blood polychlorinated biphenyls and cholesterol levels among Canadian Inuit. *Environmental Research*. 2018;160:298-305.
- Skogli HR, Geoffroy D, Weiler HA, Tell GS, Kirmayer LJ, Egeland GM. Associations between omega-3 fatty acids and 25(OH)D and psychological distress among Inuit in Canada. *International Journal of Circumpolar Health*. 2017;76(1):1302684.
- St-Jean A, Meziou S, Roy C, Ayotte P, Muckle G, Lucas M. Branched-chain and aromatic amino acids in relation to behavioral problems among young Inuit from Nunavik, Canada: a cohort study. *Pediatric Research*. 2017;82(3):416-22.
- Smylie J, Firestone M, Spiller MW, Tungasuvvingat I. Our health counts: population-based measures of urban Inuit health determinants, health status, and health care access. *Canadian Journal of Public Health Revue Canadienne de Sante Publique*. 2018;109(5-6):662-70.
- Tahir E, Cordier S, Courtemanche Y, Forget-Dubois N, Desrochers-Couture M, Belanger RE, et al. Effects of polychlorinated biphenyls exposure on physical growth from birth to childhood and adolescence: A prospective cohort study. *Environmental Research*. 2020;189:109924.
- Tratt E, Sarmiento I, Gamelin R, Nayoumealuk J, Andersson N, Brassard P. Fuzzy cognitive mapping with Inuit women: what needs to change to improve cervical cancer screening in Nunavik, northern Quebec? *BMC Health Services Research*. 2020;20(1):529.
- Tjepkema M, Bushnik T, Bougie E. Life expectancy of First Nations, Metis and Inuit household populations in Canada. *Health Reports*. 2019;30(12):3-10.

- Tse SM, Weiler H, Kovesi T. Food insecurity, vitamin D insufficiency and respiratory infections among Inuit children. *International Journal of Circumpolar Health*. 2016;75:29954.
- Vang ZM, Gagnon R, Lee T, Jimenez V, Navickas A, Pelletier J, et al. Interactions Between Indigenous Women Awaiting Childbirth Away From Home and Their Southern, Non-Indigenous Health Care Providers. *Qualitative Health Research*. 2018;28(12):1858-70.
- Vincent D, Rice J, Chan J, Grassau P. Provision of comprehensive, culturally competent palliative care in the Qikiqtaaluk region of Nunavut: Health care providers' perspectives. *Canadian Family Physician*. 2019;65(4):e163-e9.
- Wright CJ, Sargeant JM, Edge VL, Ford JD, Farahbakhsh K, Ricg, et al. Water quality and health in northern Canada: stored drinking water and acute gastrointestinal illness in Labrador Inuit. *Environmental Science & Pollution Research*. 2018;25(33):32975-87.
- Wright CJ, Sargeant JM, Edge VL, Ford JD, Farahbakhsh K, Shiwak I, et al. How are perceptions associated with water consumption in Canadian Inuit? A cross-sectional survey in Rigolet, Labrador. *Science of the Total Environment*. 2018;618:369-78.
- Young MG, Manion K. Harm reduction through housing first: an assessment of the Emergency Warming Centre in Inuvik, Canada. *Harm Reduction Journal*. 2017;14(1):8.
- Young TK, Kelly JJ, Friborg J, Soininen L, Wong KO. Cancer among circumpolar populations: an emerging public health concern. *International Journal of Circumpolar Health*. 2016;75:29787.
- Fraser S, Rouillard R, Nadeau L, D'Ostie Racine L, Mickpegak R. Collaborating to improve child and youth mental health in Nunavik. *Études/Inuit/Studies*. 2016;40(1):23-41.
- Lamalice A, Avaré E, Coxam V, Thora Herrmann C, Desbiens YW, Blangy S. Supporting food security in the Far North: Community greenhouse projects in Nunavik and Nunavut. *Inuit Studies* 2016;40(1):147-69.
- Morris M. Inuit involvement in developing a participatory action research project on youth, violence prevention, and health promotion. *Études/Inuit/Studies*. 2016;40(1):105-25.
- Baron M, Riva M, Fletcher C, Lynch M, Lyonnais M-C, Laouan Sidi EA. Conceptualisation and Operationalisation of a Holistic Indicator of Health for Older Inuit: Results of a Sequential Mixed-Methods Project. *Social Indicators Research*. 2021;155(1):47-72.
- Emanuelson K, Pearce T, Oakes J, Harper SL, Ford JD. Sewing and Inuit women's health in the Canadian Arctic. *Social Science & Medicine*. 2020:113523.
- Gomez Cardona L, Brown K, McComber M, Outerbridge J, Parent-Racine E, Phillips A, et al. Depression or resilience? A participatory study to identify an appropriate assessment tool with Kanien'kéha (Mohawk) and Inuit in Quebec. *Soc Psychiatry Psychiatr Epidemiol*. 2021;56(10):1891-902.
- Lamoureux-Tremblay V, Chauret M, Muckle G, Maheu F, Suffren S, Jacobson SW, et al. Altered functional activations of prefrontal brain areas during emotional processing of fear in Inuit adolescents exposed to environmental contaminants. *Neurotoxicol Teratol*. 2021;85:106973.
- Alvarez GG, Zwerling AA, Duncan C, Pease C, Van Dyk D, Behr MA, et al. Molecular epidemiology of *Mycobacterium tuberculosis* to describe the transmission dynamics

among Inuit residing in Iqaluit Nunavut using whole genome sequencing. *Clinical Infectious Diseases*. 2020;13:13.

- Brubacher LJ, Dewey CE, Tatty N, Healey Akearok GK, Cunsolo A, Humphries S, et al. "Sewing Is Part of Our Tradition": A Case Study of Sewing as a Strategy for Arts-Based Inquiry in Health Research With Inuit Women. *Qualitative Health Research*. 2021;31(14):2602-16.
- Fraser SL, Moulin L, Gaulin D, Thompson J. On the move: exploring Inuit and non-Inuit health service providers' perspectives about youth, family and community participation in care in Nunavik. *BMC Health Services Research*. 2021;21(1):94.
- Jull J, Sheppard AJ, Hizaka A, Barton G, Doering P, Dorschner D, et al. Experiences of Inuit in Canada who travel from remote settings for cancer care and impacts on decision making. *BMC Health Services Research*. 2021;21(1):328.
- Lauzière J, Fletcher C, Gaboury I. Factors influencing the provision of care for Inuit in a mainstream residential addiction rehabilitation centre in Southern Canada, an instrumental case study into cultural safety. *Substance Abuse Treatment, Prevention, and Policy*. 2021;16(1):55.
- Li YA, Martin I, Tsang R, Squires SG, Demczuk W, Desai S. Invasive Bacterial Diseases in Northern Canada, 2006-2013. *Canada Communicable Disease Report*. 2016;42(4):74-82.
- Moon J, Pop C, Talaat M, Boulanger N, Perron PA, Deckelbaum D, et al. Trauma in northern Quebec, 2005-2014: epidemiologic features, transfers and patient outcomes. *Can J Surg*. 2021;64(5):E527-e33.
- Walker EV, Yuan Y, Girgis S, Goodman KJ. Patterns of fish and whale consumption in relation to methylmercury in hair among residents of Western Canadian Arctic communities. *BMC Public Health*. 2020;20(1):1073.
- Akande VO, Fawehinmi TO, Ruiter RAC, Kremers SPJ. Healthy Dietary Choices and Physical Activity Participation in the Canadian Arctic: Understanding Nunavut Inuit Perspectives on the Barriers and Enablers. *Int J Environ Res Public Health*. 2021;18(3).
- Anang P, Gottlieb N, Putulik S, Iguptak S, Gordon E. Learning to Fail Better: Reflections on the Challenges and Risks of Community-Based Participatory Mental Health Research With Inuit Youth in Nunavut. *Frontiers in Public Health*. 2021;9.
- Boksa P, Hutt-MacLeod D, Clair L, Brass G, Bighead S, MacKinnon A, et al. Demographic and Clinical Presentations of Youth using Enhanced Mental Health Services in Six Indigenous Communities from the ACCESS Open Minds Network. *Can J Psychiatry*. 2022;67(3):179-91.
- Bougie E. Acute-care hospitalizations among First Nations people, Inuit and Métis: Results from the 2006 and 2011 Canadian Census Health and Environment Cohorts. *Health Rep*. 2021;32(7):11-26.
- Collins SA, Edmunds S, Akearok GH, Thompson JR, Erickson AC, Hildes-Ripstein E, et al. Association of the CPT1A p.P479L Metabolic Gene Variant With Childhood Respiratory and Other Infectious Illness in Nunavut. *Front Pediatr*. 2021;9:678553.
- Enuaraq S, Gifford W, Ashton S, Al Awar Z, Larocque C, Rolfe D. Understanding culturally safe cancer survivorship care with inuit in an urban community. *Int J Circumpolar Health*. 2021;80(1):1949843-.

- Fraser SL, Parent V, Weetaltuk C, Hunter J. Families navigating community resources: understanding and supporting Nunavimmiut families. *International journal of circumpolar health*. 2021;80(1):1935594-.
- Healey Akearok G, Tabish T, Cherba M. Cultural orientation and safety app for new and short-term health care providers in Nunavut. *Canadian Journal of Public Health Revue Canadienne de Sante Publique*. 2020;111(5):694-700.
- Medehouenou TCM, Roy C, Tremblay PY, St-Jean A, Meziou S, Muckle G, et al. Metabolic features of adiposity and glucose homeostasis among school-aged Inuit children from Nunavik (Northern Quebec, Canada). *Int J Circumpolar Health*. 2021;80(1):1858605.
- Middleton J, Cunsolo A, Pollock N, Jones-Bitton A, Wood M, Shiwak I, et al. Temperature and place associations with Inuit mental health in the context of climate change. *Environmental Research*. 2021;198:111166.
- Plourde-Léveillé L, Fraser S. Vers une décolonisation des ressources de soins et services sociaux : les travailleurs communautaires locaux au Nunavik. *Can J Public Health*. 2021;112(4):676-84.
- Ready E, Collings P. "All the problems in the community are multifaceted and related to each other": Inuit concerns in an era of climate change. *American Journal of Human Biology*. 2021;33(4):e23516.
- Shapiro GD, Sheppard AJ, Mashford-Pringle A, Bushnik T, Kramer MS, Kaufman JS, et al. Housing conditions and adverse birth outcomes among Indigenous people in Canada. *Can J Public Health*. 2021;112(5):903-11.
- Tousignant B, Brûlé J. Refractive error, risk of amblyopia and eye care services utilisation among Nunavik Inuit in Northern Canada. *Clin Exp Optom*. 2021:1-6.
- Beaulieu E, Therrien AM, Muckle G, Bélanger RE. Socio-demographic and substance use characteristics of unintentional injuries among Nunavik youth. *Int J Circumpolar Health*. 2022;81(1):2012026.
- Collins SA, Hildes-Ripstein GE, Thompson JR, Edmunds S, Miners A, Rockman-Greenberg C, et al. Neonatal hypoglycemia and the CPT1A P479L variant in term newborns: A retrospective cohort study of Inuit newborns from Kivalliq Nunavut. *Paediatr Child Health*. 2021;26(4):218-27.
- Gamelin R, Hébert M, Tratt E, Brassard P. Ethnographic study of the barriers and facilitators to implementing human papillomavirus (HPV) self-sampling as a primary screening strategy for cervical cancer among Inuit women of Nunavik, Northern Quebec. *Int J Circumpolar Health*. 2022;81(1):2032930.
- McDonnell L, Lavoie JG, Clark W, Dutton R, Anawak C, Anawak J, et al. Unforeseen benefits: outcomes of the Qanuungitsiarutiksait study. *International journal of circumpolar health*. 2022;81(1):2008614-.
- Moisan C, Bélanger R, Calvin J, Shipaluk L, Fraser S, Morin V, et al. Exploring ambivalence toward pregnancy among young Inuit women. *Cult Health Sex*. 2022:1-16.
- Roberts C, Darroch F, Giles A, van Bruggen R. You're carrying so many people's stories: vicarious trauma among fly-in fly-out mental health service providers in Canada. *International Journal of Qualitative Studies on Health and Well-being*. 2022;17(1):2040089.

- Wilson A, Levkoe C, Andrée P, Skinner K, Spring A, Wesche S, et al. Strengthening sustainable northern food systems: federal policy constraints and potential opportunities ARTIC. 2020;73(3).
- Ollier M, Giles AR, Etter M, Ruttan J, Elanik N, Goose R, et al. Promoting a culturally safe evaluation of an On-the-Land Wellness Program in the Inuvialuit Settlement Region Journal of the Arctic Institute of North America 2020;73(3):278-404.
