# Supplementary material for: Shifting paradigm from biomedical to decolonised methods in Inuit public health research in Canada: a scoping review
Source: HighWire-hosted journal article supplement (doi:10.1136/bmjgh-2021-008311), 2022-11-01
Supplement: bmjgh-2021-008311supp005_data_supplement.pdf [file bmjgh-2021-008311supp005_data_supplement.pdf]

| Project ID | Project Name | Project Manager   | Project Status | Project Description    | Project Details    |
|------------|--------------|-------------------|----------------|------------------------|--------------------|
| 1          | Project A    | John Doe          | Completed      | Project A description  | Project A details  |
| 2          | Project B    | Jane Smith        | In Progress    | Project B description  | Project B details  |
| 3          | Project C    | Mike Johnson      | On Hold        | Project C description  | Project C details  |
| 4          | Project D    | Sarah Brown       | Completed      | Project D description  | Project D details  |
| 5          | Project E    | David White       | In Progress    | Project E description  | Project E details  |
| 6          | Project F    | Emily Green       | On Hold        | Project F description  | Project F details  |
| 7          | Project G    | Chris Black       | Completed      | Project G description  | Project G details  |
| 8          | Project H    | Alexander Grey    | In Progress    | Project H description  | Project H details  |
| 9          | Project I    | Olivia Blue       | On Hold        | Project I description  | Project I details  |
| 10         | Project J    | Noah Red          | Completed      | Project J description  | Project J details  |
| 11         | Project K    | Isabella Purple   | In Progress    | Project K description  | Project K details  |
| 12         | Project L    | Liam Yellow       | On Hold        | Project L description  | Project L details  |
| 13         | Project M    | Mia Orange        | Completed      | Project M description  | Project M details  |
| 14         | Project N    | Benjamin Green    | In Progress    | Project N description  | Project N details  |
| 15         | Project O    | Charlotte Blue    | On Hold        | Project O description  | Project O details  |
| 16         | Project P    | Lucas Red         | Completed      | Project P description  | Project P details  |
| 17         | Project Q    | Hannah Purple     | In Progress    | Project Q description  | Project Q details  |
| 18         | Project R    | Ethan Yellow      | On Hold        | Project R description  | Project R details  |
| 19         | Project S    | Ava Orange        | Completed      | Project S description  | Project S details  |
| 20         | Project T    | Michael Green     | In Progress    | Project T description  | Project T details  |
| 21         | Project U    | Sophia Blue       | On Hold        | Project U description  | Project U details  |
| 22         | Project V    | Daniel Red        | Completed      | Project V description  | Project V details  |
| 23         | Project W    | Olivia Purple     | In Progress    | Project W description  | Project W details  |
| 24         | Project X    | Matthew Yellow    | On Hold        | Project X description  | Project X details  |
| 25         | Project Y    | Natalie Orange    | Completed      | Project Y description  | Project Y details  |
| 26         | Project Z    | Christopher Green | In Progress    | Project Z description  | Project Z details  |
| 27         | Project AA   | Victoria Blue     | On Hold        | Project AA description | Project AA details |
| 28         | Project AB   | Andrew Red        | Completed      | Project AB description | Project AB details |
| 29         | Project AC   | Grace Purple      | In Progress    | Project AC description | Project AC details |
| 30         | Project AD   | Henry Yellow      | On Hold        | Project AD description | Project AD details |
| 31         | Project AE   | Ivy Orange        | Completed      | Project AE description | Project AE details |
| 32         | Project AF   | Jack Green        | In Progress    | Project AF description | Project AF details |
| 33         | Project AG   | Karen Blue        | On Hold        | Project AG description | Project AG details |
| 34         | Project AH   | Leo Red           | Completed      | Project AH description | Project AH details |
| 35         | Project AI   | Mia Purple        | In Progress    | Project AI description | Project AI details |
| 36         | Project AJ   | Nathan Yellow     | On Hold        | Project AJ description | Project AJ details |
| 37         | Project AK   | Olivia Orange     | Completed      | Project AK description | Project AK details |
| 38         | Project AL   | Peter Green       | In Progress    | Project AL description | Project AL details |
| 39         | Project AM   | Quinn Blue        | On Hold        | Project AM description | Project AM details |
| 40         | Project AN   | Ryan Red          | Completed      | Project AN description | Project AN details |
| 41         | Project AO   | Sarah Purple      | In Progress    | Project AO description | Project AO details |
| 42         | Project AP   | Thomas Yellow     | On Hold        | Project AP description | Project AP details |
| 43         | Project AQ   | Uma Orange        | Completed      | Project AQ description | Project AQ details |
| 44         | Project AR   | Victor Green      | In Progress    | Project AR description | Project AR details |
| 45         | Project AS   | Wendy Blue        | On Hold        | Project AS description | Project AS details |
| 46         | Project AT   | Xavier Red        | Completed      | Project AT description | Project AT details |
| 47         | Project AU   | Yara Purple       | In Progress    | Project AU description | Project AU details |
| 48         | Project AV   | Zoe Yellow        | On Hold        | Project AV description | Project AV details |
| 49         | Project AW   | Adam Orange       | Completed      | Project AW description | Project AW details |
| 50         | Project AX   | Bella Green       | In Progress    | Project AX description | Project AX details |
| 51         | Project AY   | Charlie Blue      | On Hold        | Project AY description | Project AY details |
| 52         | Project AZ   | Diana Red         | Completed      | Project AZ description | Project AZ details |
| 53         | Project BA   | Ethan Purple      | In Progress    | Project BA description | Project BA details |
| 54         | Project BB   | Fiona Yellow      | On Hold        | Project BB description | Project BB details |
| 55         | Project BC   | Gavin Orange      | Completed      | Project BC description | Project BC details |
| 56         | Project BD   | Helen Green       | In Progress    | Project BD description | Project BD details |
| 57         | Project BE   | Ian Blue          | On Hold        | Project BE description | Project BE details |
| 58         | Project BF   | Jane Red          | Completed      | Project BF description | Project BF details |
| 59         | Project BG   | Karl Purple       | In Progress    | Project BG description | Project BG details |
| 60         | Project BH   | Laura Yellow      | On Hold        | Project BH description | Project BH details |
| 61         | Project BI   | Mark Orange       | Completed      | Project BI description | Project BI details |
| 62         | Project BJ   | Nancy Green       | In Progress    | Project BJ description | Project BJ details |
| 63         | Project BK   | Oscar Blue        | On Hold        | Project BK description | Project BK details |
| 64         | Project BL   | Pamela Red        | Completed      | Project BL description | Project BL details |
| 65         | Project BM   | Quinn Purple      | In Progress    | Project BM description | Project BM details |
| 66         | Project BN   | Rachel Yellow     | On Hold        | Project BN description | Project BN details |
| 67         | Project BO   | Sam Orange        | Completed      | Project BO description | Project BO details |
| 68         | Project BP   | Tina Green        | In Progress    | Project BP description | Project BP details |
| 69         | Project BQ   | Uma Blue          | On Hold        | Project BQ description | Project BQ details |
| 70         | Project BR   | Victor Red        | Completed      | Project BR description | Project BR details |
| 71         | Project BS   | Wendy Purple      | In Progress    | Project BS description | Project BS details |
| 72         | Project BT   | Xavier Yellow     | On Hold        | Project BT description | Project BT details |
| 73         | Project BU   | Yara Orange       | Completed      | Project BU description | Project BU details |
| 74         | Project BV   | Zoe Green         | In Progress    | Project BV description | Project BV details |
| 75         | Project BW   | Adam Blue         | On Hold        | Project BW description | Project BW details |
| 76         | Project BX   | Bella Red         | Completed      | Project BX description | Project BX details |
| 77         | Project BY   | Charlie Purple    | In Progress    | Project BY description | Project BY details |
| 78         | Project BZ   | Diana Yellow      | On Hold        | Project BZ description | Project BZ details |
| 79         | Project CA   | Ethan Orange      | Completed      | Project CA description | Project CA details |
| 80         | Project CB   | Fiona Green       | In Progress    | Project CB description | Project CB details |
| 81         | Project CC   | Gavin Blue        | On Hold        | Project CC description | Project CC details |
| 82         | Project CD   | Helen Red         | Completed      | Project CD description | Project CD details |
| 83         | Project CE   | Ian Purple        | In Progress    | Project CE description | Project CE details |
| 84         | Project CF   | Jane Yellow       | On Hold        | Project CF description | Project CF details |
| 85         | Project CG   | Karl Orange       | Completed      | Project CG description | Project CG details |
| 86         | Project CH   | Laura Green       | In Progress    | Project CH description | Project CH details |
| 87         | Project CI   | Mark Blue         | On Hold        | Project CI description | Project CI details |
| 88         | Project CJ   | Nancy Red         | Completed      | Project CJ description | Project CJ details |
| 89         | Project CK   | Oscar Purple      | In Progress    | Project CK description | Project CK details |
| 90         | Project CL   | Pamela Yellow     | On Hold        | Project CL description | Project CL details |
| 91         | Project CM   | Quinn Orange      | Completed      | Project CM description | Project CM details |
| 92         | Project CN   | Rachel Green      | In Progress    | Project CN description | Project CN details |
| 93         | Project CO   | Sam Blue          | On Hold        | Project CO description | Project CO details |
| 94         | Project CP   | Tina Red          | Completed      | Project CP description | Project CP details |
| 95         | Project CQ   | Uma Purple        | In Progress    | Project CQ description | Project CQ details |
| 96         | Project CR   | Victor Yellow     | On Hold        | Project CR description | Project CR details |
| 97         | Project CS   | Wendy Orange      | Completed      | Project CS description | Project CS details |
| 98         | Project CT   | Xavier Green      | In Progress    | Project CT description | Project CT details |
| 99         | Project CU   | Yara Blue         | On Hold        | Project CU description | Project CU details |
| 100        | Project CV   | Zoe Red           | Completed      | Project CV description | Project CV details |
| 101        | Project CW   | Adam Purple       | In Progress    | Project CW description | Project CW details |
| 102        | Project CX   | Bella Yellow      | On Hold        | Project CX description | Project CX details |
| 103        | Project CY   | Charlie Orange    | Completed      | Project CY description | Project CY details |
| 104        | Project CZ   | Diana Green       | In Progress    | Project CZ description | Project CZ details |
| 105        | Project DA   | Ethan Blue        | On Hold        | Project DA description | Project DA details |
| 106        | Project DB   | Fiona Red         | Completed      | Project DB description | Project DB details |
| 107        | Project DC   | Gavin Purple      | In Progress    | Project DC description | Project DC details |
| 108        | Project DD   | Helen Yellow      | On Hold        | Project DD description | Project DD details |
| 109        | Project DE   | Ian Orange        | Completed      | Project DE description | Project DE details |
| 110        | Project DF   | Jane Green        | In Progress    | Project DF description | Project DF details |
| 111        | Project DG   | Karl Blue         | On Hold        | Project DG description | Project DG details |
| 112        | Project DH   | Laura Red         | Completed      | Project DH description | Project DH details |
| 113        | Project DI   | Mark Purple       | In Progress    | Project DI description | Project DI details |
| 114        | Project DJ   | Nancy Yellow      | On Hold        | Project DJ description | Project DJ details |
| 115        | Project DK   | Oscar Orange      | Completed      | Project DK description | Project DK details |
| 116        | Project DL   | Pamela Green      | In Progress    | Project DL description | Project DL details |
| 117        | Project DM   | Quinn Blue        | On Hold        | Project DM description | Project DM details |
| 118        | Project DN   | Rachel Red        | Completed      | Project DN description | Project DN details |
| 119        | Project DO   | Sam Purple        | In Progress    | Project DO description | Project DO details |
| 120        | Project DP   | Tina Yellow       | On Hold        | Project DP description | Project DP details |
| 121        | Project DQ   | Uma Orange        | Completed      | Project DQ description | Project DQ details |
| 122        | Project DR   | Victor Green      | In Progress    | Project DR description | Project DR details |
| 123        | Project DS   | Wendy Blue        | On Hold        | Project DS description | Project DS details |
| 124        | Project DT   | Xavier Red        | Completed      | Project DT description | Project DT details |
| 125        | Project DU   | Yara Purple       | In Progress    | Project DU description | Project DU details |
| 126        | Project DV   | Zoe Yellow        | On Hold        | Project DV description | Project DV details |
| 127        | Project DW   | Adam Orange       | Completed      | Project DW description | Project DW details |
| 128        | Project DX   | Bella Green       | In Progress    | Project DX description | Project DX details |
| 129        | Project DY   | Charlie Blue      | On Hold        | Project DY description | Project DY details |
| 130        | Project DZ   | Diana Red         | Completed      | Project DZ description | Project DZ details |
| 131        | Project EA   | Ethan Purple      | In Progress    | Project EA description | Project EA details |
| 132        | Project EB   | Fiona Yellow      | On Hold        | Project EB description | Project EB details |
| 133        | Project EC   | Gavin Orange      | Completed      | Project EC description | Project EC details |
| 134        | Project ED   | Helen Green       | In Progress    | Project ED description | Project ED details |
| 135        | Project EE   | Ian Blue          | On Hold        | Project EE description | Project EE details |
| 136        | Project EF   | Jane Red          | Completed      | Project EF description | Project EF details |
| 137        | Project EG   | Karl Purple       | In Progress    | Project EG description | Project EG details |
| 138        | Project EH   | Laura Yellow      | On Hold        | Project EH description | Project EH details |
| 139        | Project EI   | Mark Orange       | Completed      | Project EI description | Project EI details |
| 140        | Project EJ   | Nancy Green       | In Progress    | Project EJ description | Project EJ details |
| 141        | Project EK   | Oscar Blue        | On Hold        | Project EK description | Project EK details |
| 142        | Project EL   | Pamela Red        | Completed      | Project EL description | Project EL details |
| 143        | Project EM   | Quinn Purple      | In Progress    | Project EM description | Project EM details |
| 144        | Project EN   | Rachel Yellow     | On Hold        | Project EN description | Project EN details |
| 145        | Project EO   | Sam Orange        | Completed      | Project EO description | Project EO details |
| 146        | Project EP   | Tina Green        | In Progress    | Project EP description | Project EP details |
| 147        | Project EQ   | Uma Blue          | On Hold        | Project EQ description | Project EQ details |
| 148        | Project ER   | Victor Red        | Completed      | Project ER description | Project ER details |
| 149        | Project ES   | Wendy Purple      | In Progress    | Project ES description | Project ES details |
| 150        | Project ET   | Xavier Yellow     | On Hold        | Project ET description | Project ET details |
| 151        | Project EU   | Yara Orange       | Completed      | Project EU description | Project EU details |
| 152        | Project EV   | Zoe Green         | In Progress    | Project EV description | Project EV details |
| 153        | Project EW   | Adam Blue         | On Hold        | Project EW description | Project EW details |
| 154        | Project EX   | Bella Red         | Completed      | Project EX description | Project EX details |
| 155        | Project EY   | Charlie Purple    | In Progress    | Project EY description | Project EY details |
| 156        | Project EZ   | Diana Yellow      | On Hold        | Project EZ description | Project EZ details |
| 157        | Project FA   | Ethan Orange      | Completed      | Project FA description | Project FA details |
| 158        | Project FB   | Fiona Green       | In Progress    | Project FB description | Project FB details |
| 159        | Project FC   | Gavin Blue        | On Hold        | Project FC description | Project FC details |
| 160        | Project FD   | Helen Red         | Completed      | Project FD description | Project FD details |
| 161        | Project FE   | Ian Purple        | In Progress    | Project FE description | Project FE details |
| 162        | Project FF   | Jane Yellow       | On Hold        | Project FF description | Project FF details |
| 163        | Project FG   | Karl Orange       | Completed      | Project FG description | Project FG details |
| 164        | Project FH   | Laura Green       | In Progress    | Project FH description | Project FH details |
| 165        | Project FI   | Mark Blue         | On Hold        | Project FI description | Project FI details |
| 166        | Project FJ   | Nancy Red         | Completed      | Project FJ description | Project FJ details |
| 167        | Project FK   | Oscar Purple      | In Progress    | Project FK description | Project FK details |
| 168        | Project FL   | Pamela Yellow     | On Hold        | Project FL description | Project FL details |
| 169        | Project FM   | Quinn Orange      | Completed      | Project FM description | Project FM details |
| 170        | Project FN   | Rachel Green      | In Progress    | Project FN description | Project FN details |
| 171        | Project FO   | Sam Blue          | On Hold        | Project FO description | Project FO details |
| 172        | Project FP   | Tina Red          | Completed      | Project FP description | Project FP details |
| 173        | Project FQ   | Uma Purple        | In Progress    | Project FQ description | Project FQ details |
| 174        | Project FR   | Victor Yellow     | On Hold        | Project FR description | Project FR details |
| 175        | Project FS   | Wendy Orange      | Completed      | Project FS description | Project FS details |
| 176        | Project FT   | Xavier Green      | In Progress    | Project FT description | Project FT details |
| 177        | Project FU   | Yara Blue         | On Hold        | Project FU description | Project FU details |
| 178        | Project FV   | Zoe Red           | Completed      | Project FV description | Project FV details |
| 179        | Project FW   | Adam Purple       | In Progress    | Project FW description | Project FW details |
| 180        | Project FX   | Bella Yellow      | On Hold        | Project FX description | Project FX details |
| 181        | Project FY   | Charlie Orange    | Completed      | Project FY description | Project FY details |
| 182        | Project FZ   | Diana Green       | In Progress    | Project FZ description | Project FZ details |
| 183        | Project GA   | Ethan Blue        | On Hold        | Project GA description | Project GA details |
| 184        | Project GB   | Fiona Red         | Completed      | Project GB description | Project GB details |
| 185        | Project GC   | Gavin Purple      | In Progress    | Project GC description | Project GC details |
| 186        | Project GD   | Helen Yellow      | On Hold        | Project GD description | Project GD details |
| 187        | Project GE   | Ian Orange        | Completed      | Project GE description | Project GE details |
| 188        | Project GF   | Jane Green        | In Progress    | Project GF description | Project GF details |
| 189        | Project GG   | Karl Blue         | On Hold        | Project GG description | Project GG details |
| 190        | Project GH   | Laura Red         | Completed      | Project GH description | Project GH details |
| 191        | Project GI   | Mark Purple       | In Progress    | Project GI description | Project GI details |
| 192        | Project GJ   | Nancy Yellow      | On Hold        | Project GJ description | Project GJ details |
| 193        | Project GK   | Oscar Orange      | Completed      | Project GK description | Project GK details |
| 194        | Project GL   | Pamela Green      | In Progress    | Project GL description | Project GL details |
| 195        | Project GM   | Quinn Blue        | On Hold        | Project GM description | Project GM details |
| 196        | Project GN   | Rachel Red        | Completed      | Project GN description | Project GN details |
| 197        | Project GO   | Sam Purple        | In Progress    | Project GO description | Project GO details |
| 198        | Project GP   | Tina Yellow       | On Hold        | Project GP description | Project GP details |
| 199        | Project GQ   | Uma Orange        | Completed      | Project GQ description | Project GQ details |
| 200        | Project GR   | Victor Green      | In Progress    | Project GR description | Project GR details |
| 201        | Project GS   | Wendy Blue        | On Hold        | Project GS description | Project GS details |
| 202        | Project GT   | Xavier Red        | Completed      | Project GT description | Project GT details |
| 203        | Project GU   | Yara Purple       | In Progress    | Project GU description | Project GU details |
| 204        | Project GV   | Zoe Yellow        | On Hold        | Project GV description | Project GV details |
| 205        | Project GW   | Adam Orange       | Completed      | Project GW description | Project GW details |
| 206        | Project GX   | Bella Green       | In Progress    | Project GX description | Project GX details |
| 207        | Project GY   | Charlie Blue      | On Hold        | Project GY description | Project GY details |
| 208        | Project GZ   | Diana Red         | Completed      | Project GZ description | Project GZ details |
| 209        | Project HA   | Ethan Purple      | In Progress    | Project HA description | Project HA details |
| 210        | Project HB   | Fiona Yellow      | On Hold        | Project HB description | Project HB details |
| 211        | Project HC   | Gavin Orange      | Completed      | Project HC description | Project HC details |
| 212        | Project HD   | Helen Green       | In Progress    | Project HD description | Project HD details |
| 213        | Project HE   | Ian Blue          | On Hold        | Project HE description | Project HE details |
| 214        | Project HF   | Jane Red          | Completed      | Project HF description | Project HF details |
| 215        | Project HG   | Karl Purple       | In Progress    | Project HG description | Project HG details |
| 216        | Project HH   | Laura Yellow      | On Hold        | Project HH description | Project HH details |
| 217        | Project HI   | Mark Orange       | Completed      | Project HI description | Project HI details |
| 218        | Project HJ   | Nancy Green       | In Progress    | Project HJ description | Project HJ details |
| 219        | Project HK   | Oscar Blue        | On Hold        | Project HK description | Project HK details |
| 220        | Project HL   | Pamela Red        | Completed      | Project HL description | Project HL details |
| 221        | Project HM   | Quinn Purple      | In Progress    | Project HM description | Project HM details |
| 222        | Project HN   | Rachel Yellow     | On Hold        | Project HN description | Project HN details |
| 223        | Project HO   | Sam Orange        | Completed      | Project HO description | Project HO details |
| 224        | Project HP   | Tina Green        | In Progress    | Project HP description | Project HP details |
| 225        | Project HQ   | Uma Blue          | On Hold        | Project HQ description | Project HQ details |
| 226        | Project HR   | Victor Red        | Completed      | Project HR description | Project HR details |
| 227        | Project HS   | Wendy Purple      | In Progress    | Project HS description | Project HS details |
| 228        | Project HT   | Xavier Yellow     | On Hold        | Project HT description | Project HT details |
| 229        | Project HU   | Yara Orange       | Completed      | Project HU description | Project HU details |
| 230        | Project HV   | Zoe Green         | In Progress    | Project HV description | Project HV details |
| 231        | Project HW   | Adam Blue         | On Hold        | Project HW description | Project HW details |
| 232        | Project HX   | Bella Red         | Completed      | Project HX description | Project HX details |
| 233        | Project HY   | Charlie Purple    | In Progress    | Project HY description | Project HY details |
| 234        | Project HZ   | Diana Yellow      | On Hold        | Project HZ description | Project HZ details |
| 235        | Project IA   | Ethan Orange      | Completed      | Project IA description | Project IA details |
| 236        | Project IB   | Fiona Green       | In Progress    | Project IB description | Project IB details |
| 237        | Project IC   | Gavin Blue        | On Hold        | Project IC description | Project IC details |
| 238        | Project ID   | Helen Red         | Completed      | Project ID description | Project ID details |
| 239        | Project IE   | Ian Purple        | In Progress    | Project IE description | Project IE details |
| 240        | Project IF   | Jane Yellow       | On Hold        | Project IF description | Project IF details |
| 241        | Project IG   | Karl Orange       | Completed      | Project IG description | Project IG details |
| 242        | Project IH   | Laura Green       | In Progress    | Project IH description | Project IH details |
| 243        | Project II   | Mark Blue         | On Hold        | Project II description | Project II details |
| 244        | Project IJ   | Nancy Red         | Completed      | Project IJ description | Project IJ details |
| 245        | Project IK   | Oscar Purple      | In Progress    | Project IK description | Project IK details |
| 246        | Project IL   | Pamela Yellow     | On Hold        | Project IL description | Project IL details |
| 247        | Project IM   | Quinn Orange      | Completed      | Project IM description | Project IM details |
| 248        | Project IN   | Rachel Green      | In Progress    | Project IN description | Project IN details |
| 249        | Project IO   | Sam Blue          | On Hold        | Project IO description | Project IO details |
| 250        | Project IP   | Tina Red          | Completed      | Project IP description | Project IP details |
| 251        | Project IQ   | Uma Purple        | In Progress    | Project IQ description | Project IQ details |
| 252        | Project IR   | Victor Yellow     | On Hold        | Project IR description | Project IR details |
| 253        | Project IS   | Wendy Orange      | Completed      | Project IS description | Project IS details |
| 254        | Project IT   | Xavier Green      | In Progress    | Project IT description | Project IT details |
| 255        | Project IU   | Yara Blue         | On Hold        | Project IU description | Project IU details |
|            |              |                   |                |                        |                    |
